# Supplementary material for: Global proteomics reveals pathways of mesenchymal stem cells altered by Mycobacterium tuberculosis.
Source: Research Square preprint supplement (doi:10.21203/rs.3.rs-4179764/v1), 2024-08-29
Supplement: Supplementary file 1 [file 2f056d3a52af1df754778e92.xlsx]

## Sheet: DEPs Rv_Vs_UI
ID	logFC	AveExpr	t	P.Value	adj.P.Val	B
CMPK2	6.375	4.559	2431	2.737e-14	2.737e-14	20.6
B4DI61	6.229	4.486	2375	3.023e-14	3.023e-14	20.59
CXCL10	6.19	4.466	2360	3.105e-14	3.105e-14	20.58
TFPI2	6.15	4.446	2345	3.192e-14	3.192e-14	20.58
CTGF	6.022	4.383	2297	3.491e-14	3.491e-14	20.57
DDX58	5.833	4.288	2224	4.003e-14	4.003e-14	20.55
ITIH2	5.781	4.262	2204	4.16e-14	4.16e-14	20.54
IFIH1	5.781	4.262	2204	4.16e-14	4.16e-14	20.54
AEBP1	5.728	4.236	2183	4.332e-14	4.332e-14	20.54
IL36G	5.728	4.236	2183	4.332e-14	4.332e-14	20.54
IL1B	5.615	4.179	2136	4.757e-14	4.757e-14	20.51
MFGE8	5.615	4.179	2136	4.757e-14	4.757e-14	20.51
BMP1	5.555	4.149	2108	5.031e-14	5.031e-14	20.5
NFKB2	5.555	4.149	2108	5.031e-14	5.031e-14	20.5
PYCR1	5.285	4.014	1961	6.859e-14	6.859e-14	20.37
THBS2	5.285	4.014	1961	6.859e-14	6.859e-14	20.37
APOL2	5.209	3.976	1915	7.588e-14	7.588e-14	20.32
PPIF	5.209	3.976	1915	7.588e-14	7.588e-14	20.32
CXCL1	5.209	3.976	1915	7.588e-14	7.588e-14	20.32
CXCL8	5.044	3.894	1816	9.529e-14	9.529e-14	20.2
okuribin	5.044	3.894	1816	9.529e-14	9.529e-14	20.2
Apoc3	5.044	3.894	1816	9.529e-14	9.529e-14	20.2
C15ORF48	5.044	3.894	1816	9.529e-14	9.529e-14	20.2
CNP	4.858	3.801	1700	1.264e-13	1.264e-13	20.05
B2RD40	4.858	3.801	1700	1.264e-13	1.264e-13	20.05
IFI16	4.858	3.801	1700	1.264e-13	1.264e-13	20.05
OCIAD1	4.755	3.749	1632	1.505e-13	1.505e-13	19.95
MMP13	4.755	3.749	1632	1.505e-13	1.505e-13	19.95
HMOX1	4.644	3.693	1557	1.84e-13	1.84e-13	19.83
RRAD	4.644	3.693	1557	1.84e-13	1.84e-13	19.83
GBP2	4.644	3.693	1557	1.84e-13	1.84e-13	19.83
B3KQQ9	4.392	3.568	1357	3.306e-13	3.306e-13	19.43
TOM1	4.392	3.568	1357	3.306e-13	3.306e-13	19.43
INHBA	4.392	3.568	1357	3.306e-13	3.306e-13	19.43
CXCL6	4.248	3.496	1201	5.574e-13	5.574e-13	19.02
GREM1	4.248	3.496	1201	5.574e-13	5.574e-13	19.02
SBDS	4.227	5.598	2.924	0.03973	0.03973	-7.483
Q71U45	4.178	5.549	2.924	0.03973	0.03973	-7.487
adamts1	4.087	3.415	1020	1.119e-12	1.119e-12	18.44
MRPS23	4.087	3.415	1020	1.119e-12	1.119e-12	18.44
APOA1	4.087	3.415	1020	1.119e-12	1.119e-12	18.44
RPL22L1	4.044	5.416	2.924	0.03973	0.03973	-7.499
eif2ak2	3.907	3.325	882.3	2.084e-12	2.084e-12	17.96
Q59GW5	3.907	3.325	882.3	2.084e-12	2.084e-12	17.96
Q71V07	3.889	5.26	2.924	0.03973	0.03973	-7.512
EDF1	3.854	5.226	2.924	0.03974	0.03974	-7.515
VTN	3.854	5.226	2.924	0.03974	0.03974	-7.515
IKBIP	3.819	5.19	2.923	0.03976	0.03976	-7.519
HNRNPH3	3.782	5.153	2.922	0.03981	0.03981	-7.523
IGFBP7	3.782	5.153	2.922	0.03981	0.03981	-7.523
PCOLCE	3.703	5.075	2.913	0.04017	0.04017	-7.538
UBQLN1	3.703	5.075	2.913	0.04017	0.04017	-7.538
PDCD6	3.703	5.075	2.913	0.04017	0.04017	-7.538
GART	3.703	5.075	2.913	0.04017	0.04017	-7.538
TOLLIP	3.524	4.895	2.86	0.04249	0.04249	-7.6
CHCHD2P9	3.524	4.895	2.86	0.04249	0.04249	-7.6
IL4I1	3.459	3.101	742.1	4.365e-12	4.365e-12	17.58
PDCD5	3.42	4.791	2.814	0.04458	0.04458	-7.648
DCTN4	3.42	4.791	2.814	0.04458	0.04458	-7.648
LYPLA1	3.363	4.734	2.787	0.04593	0.04593	-7.677
CHP1	3.239	4.61	2.716	0.04954	0.04954	-7.749
A8K079	3.17	2.957	698.9	5.643e-12	5.643e-12	17.57
CLEC3B	3.17	2.957	698.9	5.643e-12	5.643e-12	17.57
SERPINB4	3.17	2.957	698.9	5.643e-12	5.643e-12	17.57
NEBL	3.17	2.957	698.9	5.643e-12	5.643e-12	17.57
FNDC3A	2.807	2.775	642.4	8.09e-12	8.09e-12	17.52
EXOC7	2.807	2.775	642.4	8.09e-12	8.09e-12	17.52
SDHC	2.322	2.533	558.3	1.473e-11	1.473e-11	17.33
RCN2	2.322	2.533	558.3	1.473e-11	1.473e-11	17.33
Q69F39	2.322	2.533	558.3	1.473e-11	1.473e-11	17.33
LARP1	2.322	2.533	558.3	1.473e-11	1.473e-11	17.33
Q9NZY4	2.322	2.533	558.3	1.473e-11	1.473e-11	17.33
B2RAK1	-2.322	2.533	-558.3	1.473e-11	1.473e-11	17.33
MCRIP1	-2.322	2.533	-558.3	1.473e-11	1.473e-11	17.33
PTTG1IP	-2.322	2.533	-558.3	1.473e-11	1.473e-11	17.33
UBE2I	-2.807	2.775	-642.4	8.09e-12	8.09e-12	17.52
STAT3	-2.807	2.775	-642.4	8.09e-12	8.09e-12	17.52
ITGA11	-2.807	2.775	-642.4	8.09e-12	8.09e-12	17.52
ppfia4	-3.17	2.957	-698.9	5.643e-12	5.643e-12	17.57
B4DZ55	-3.17	2.957	-698.9	5.643e-12	5.643e-12	17.57
PSMB7	-3.17	2.957	-698.9	5.643e-12	5.643e-12	17.57
PIGK	-3.17	2.957	-698.9	5.643e-12	5.643e-12	17.57
ACO1	-3.17	2.957	-698.9	5.643e-12	5.643e-12	17.57
TFRC	-3.239	4.61	-2.716	0.04954	0.04954	-7.749
STT3A	-3.239	4.61	-2.716	0.04954	0.04954	-7.749
EIF4G2	-3.239	4.61	-2.716	0.04954	0.04954	-7.749
B3KQB4	-3.303	4.674	-2.754	0.04755	0.04755	-7.71
COPS2	-3.303	4.674	-2.754	0.04755	0.04755	-7.71
LSM3	-3.303	4.674	-2.754	0.04755	0.04755	-7.71
PIN1	-3.303	4.674	-2.754	0.04755	0.04755	-7.71
FBLIM1	-3.303	4.674	-2.754	0.04755	0.04755	-7.71
CYB5A	-3.363	4.734	-2.787	0.04593	0.04593	-7.677
LAMB1	-3.363	4.734	-2.787	0.04593	0.04593	-7.677
Q9UM02	-3.363	4.734	-2.787	0.04593	0.04593	-7.677
ARHGDIB	-3.363	4.734	-2.787	0.04593	0.04593	-7.677
NID2	-3.42	4.791	-2.814	0.04458	0.04458	-7.648
B3KTD5	-3.459	3.101	-742.1	4.365e-12	4.365e-12	17.58
FKBP11	-3.459	3.101	-742.1	4.365e-12	4.365e-12	17.58
COG1	-3.459	3.101	-742.1	4.365e-12	4.365e-12	17.58
LETM1	-3.473	4.845	-2.838	0.04349	0.04349	-7.623
HCFC1	-3.473	4.845	-2.838	0.04349	0.04349	-7.623
Q53GR7	-3.473	4.845	-2.838	0.04349	0.04349	-7.623
MACF1	-3.524	4.895	-2.86	0.04249	0.04249	-7.6
FAM98A	-3.524	4.895	-2.86	0.04249	0.04249	-7.6
B2R6C4	-3.524	4.895	-2.86	0.04249	0.04249	-7.6
MCU	-3.572	4.943	-2.878	0.04167	0.04167	-7.579
CCT6B	-3.572	4.943	-2.878	0.04167	0.04167	-7.579
DYNC1I2	-3.618	4.989	-2.892	0.04105	0.04105	-7.563
FLOT2	-3.618	4.989	-2.892	0.04105	0.04105	-7.563
THRAP3	-3.661	5.033	-2.904	0.04054	0.04054	-7.549
VPS35	-3.661	5.033	-2.904	0.04054	0.04054	-7.549
RNPEP	-3.7	3.222	-786.7	3.401e-12	3.401e-12	17.64
C15orf38-AP3S2	-3.7	3.222	-786.7	3.401e-12	3.401e-12	17.64
QDPR	-3.7	3.222	-786.7	3.401e-12	3.401e-12	17.64
MAPK10	-3.7	3.222	-786.7	3.401e-12	3.401e-12	17.64
CISD2	-3.7	3.222	-786.7	3.401e-12	3.401e-12	17.64
BCLAF1	-3.782	5.153	-2.922	0.03981	0.03981	-7.523
RAB5C	-3.819	5.19	-2.923	0.03976	0.03976	-7.519
PITRM1	-3.819	5.19	-2.923	0.03976	0.03976	-7.519
XPNPEP1	-3.819	5.19	-2.923	0.03976	0.03976	-7.519
COPG2	-3.819	5.19	-2.923	0.03976	0.03976	-7.519
SEC63	-3.854	5.226	-2.924	0.03974	0.03974	-7.515
cyfip2	-3.854	5.226	-2.924	0.03974	0.03974	-7.515
CTSZ	-3.889	5.26	-2.924	0.03973	0.03973	-7.512
AIFM1	-3.889	5.26	-2.924	0.03973	0.03973	-7.512
MAPK3	-3.889	5.26	-2.924	0.03973	0.03973	-7.512
INF2	-3.907	3.325	-882.3	2.084e-12	2.084e-12	17.96
TRA2A	-3.907	3.325	-882.3	2.084e-12	2.084e-12	17.96
Q59ES1	-3.907	3.325	-882.3	2.084e-12	2.084e-12	17.96
POGLUT1	-3.907	3.325	-882.3	2.084e-12	2.084e-12	17.96
c11orf68	-3.907	3.325	-882.3	2.084e-12	2.084e-12	17.96
CD59	-3.922	5.293	-2.924	0.03973	0.03973	-7.509
PSMD13	-3.922	5.293	-2.924	0.03973	0.03973	-7.509
PYGB	-4.044	5.416	-2.924	0.03973	0.03973	-7.499
NEK9	-4.087	3.415	-1020	1.119e-12	1.119e-12	18.44
NDUFA4	-4.087	3.415	-1020	1.119e-12	1.119e-12	18.44
RAP1GDS1	-4.087	3.415	-1020	1.119e-12	1.119e-12	18.44
PTK7	-4.087	3.415	-1020	1.119e-12	1.119e-12	18.44
SRPRB	-4.1	5.471	-2.924	0.03973	0.03973	-7.494
RHOG	-4.127	5.498	-2.924	0.03973	0.03973	-7.491
TMEM43	-4.127	5.498	-2.924	0.03973	0.03973	-7.491
AHCY	-4.178	5.549	-2.924	0.03973	0.03973	-7.487
COL3A1	-4.203	5.574	-2.924	0.03973	0.03973	-7.485
ABHD12	-4.248	3.496	-1201	5.574e-13	5.574e-13	19.02
SEC61A1	-4.248	3.496	-1201	5.574e-13	5.574e-13	19.02
MYADM	-4.248	3.496	-1201	5.574e-13	5.574e-13	19.02
Q59GA1	-4.248	3.496	-1201	5.574e-13	5.574e-13	19.02
ATP2B1	-4.25	5.622	-2.924	0.03973	0.03973	-7.481
EPS15L1	-4.392	3.568	-1357	3.306e-13	3.306e-13	19.43
CSE1L	-4.392	3.568	-1357	3.306e-13	3.306e-13	19.43
GALNT2	-4.392	3.568	-1357	3.306e-13	3.306e-13	19.43
UAP1L1	-4.392	3.568	-1357	3.306e-13	3.306e-13	19.43
PLA2G15	-4.392	3.568	-1357	3.306e-13	3.306e-13	19.43
Q9Y3E8	-4.392	3.568	-1357	3.306e-13	3.306e-13	19.43
OSTC	-4.524	3.633	-1467	2.368e-13	2.368e-13	19.66
TPP2	-4.524	3.633	-1467	2.368e-13	2.368e-13	19.66
CNBP	-4.524	3.633	-1467	2.368e-13	2.368e-13	19.66
LTBP1	-4.524	3.633	-1467	2.368e-13	2.368e-13	19.66
DYNLL1	-4.58	5.952	-2.924	0.03973	0.03973	-7.453
PPP2R2A	-4.644	3.693	-1557	1.84e-13	1.84e-13	19.83
GPX8	-4.644	3.693	-1557	1.84e-13	1.84e-13	19.83
SEPHS1	-4.644	3.693	-1557	1.84e-13	1.84e-13	19.83
ARFGEF2	-4.644	3.693	-1557	1.84e-13	1.84e-13	19.83
PPP3R1	-4.755	3.749	-1632	1.505e-13	1.505e-13	19.95
TMPO	-4.755	3.749	-1632	1.505e-13	1.505e-13	19.95
BCAT2	-4.858	3.801	-1700	1.264e-13	1.264e-13	20.05
ITGB5	-4.954	3.849	-1760	1.089e-13	1.089e-13	20.13
DNPEP	-4.954	3.849	-1760	1.089e-13	1.089e-13	20.13
E9PLN8	-4.954	3.849	-1760	1.089e-13	1.089e-13	20.13
DEK	-4.954	3.849	-1760	1.089e-13	1.089e-13	20.13
COLEC12	-4.954	3.849	-1760	1.089e-13	1.089e-13	20.13
TLN2	-5.021	6.392	-2.73	0.04882	0.04882	-7.652
SEC22B	-5.044	3.894	-1816	9.529e-14	9.529e-14	20.2
VBP1	-5.044	3.894	-1816	9.529e-14	9.529e-14	20.2
SCARB2	-5.209	3.976	-1915	7.588e-14	7.588e-14	20.32
SACM1L	-5.209	3.976	-1915	7.588e-14	7.588e-14	20.32
mrc2	-5.209	3.976	-1915	7.588e-14	7.588e-14	20.32
TM9SF3	-5.285	4.014	-1961	6.859e-14	6.859e-14	20.37
GDI1	-5.307	6.678	-2.924	0.03973	0.03973	-7.392
FBLN1	-5.426	4.085	-2041	5.778e-14	5.778e-14	20.44
TMX3	-5.492	4.117	-2076	5.37e-14	5.37e-14	20.47
COL1A2	-5.586	6.958	-2.924	0.03973	0.03973	-7.37
TMED7-TICAM2	-5.615	4.179	-2136	4.757e-14	4.757e-14	20.51
RAB18	-5.615	4.179	-2136	4.757e-14	4.757e-14	20.51
RAB5B	-5.672	4.208	-2161	4.527e-14	4.527e-14	20.53
SLC25A6	-5.7	7.072	-2.753	0.04759	0.04759	-7.567
PLOD2	-5.821	7.192	-2.757	0.04741	0.04741	-7.554
SRSF2	-5.833	4.288	-2224	4.003e-14	4.003e-14	20.55
CNN2	-5.869	7.241	-2.924	0.03973	0.03973	-7.347
MYL6	-6.251	7.623	-2.768	0.04685	0.04685	-7.506
MYL6	-6.274	7.646	-2.769	0.04682	0.04682	-7.504
NNT	-6.304	4.523	-2404	2.872e-14	2.872e-14	20.59
RAC2	-6.629	4.686	-203.8	1.095e-09	1.095e-09	13.5
AP1B1	-6.82	4.782	-6.573	0.002191	0.002191	-4.203
Q53GA7	-7.433	8.804	-2.798	0.04537	0.04537	-7.411
H3BN98	-7.547	5.145	-14.55	8.395e-05	8.395e-05	-0.2102
SLC25A4	-8.281	5.512	-15.96	5.68e-05	5.68e-05	0.2702
COL1A1	-9.207	5.975	-3511	5.688e-15	5.688e-15	20.73
FBN1	-9.212	5.978	-8.877	0.0006532	0.0006532	-2.727
ACTN1	-11.33	7.036	-21.84	1.508e-05	1.508e-05	1.902
ACTB	-12.94	7.84	-24.93	8.588e-06	8.588e-06	2.596
