# Supplementary material for: Global proteomics reveals pathways of mesenchymal stem cells altered by Mycobacterium tuberculosis.
Source: Research Square preprint supplement (doi:10.21203/rs.3.rs-4179764/v1), 2024-08-29
Supplement: Supplementary file 1 [file f3e1253f5ab907bc10232093.pdf]

**Supplementary table legends:**

**Supplementary information S1:** List of differentially expressed proteins (DEPs).

Sheet S1a - *M. tb* H37Rv-infected hBM-MSCs versus uninfected hBM-MSCs control (Rv Vs UI)

Sheet S1b - *M. tb* H37Ra-infected hBM-MSCs versus uninfected hBM-MSCs control (Ra Vs UI)

Sheet S1c - *M. tb* H37Rv-infected hBM-MSCs versus *M. tb* H37Ra-infected hBM-MSCs (Rv Vs Ra).

**Supplementary information S2:** List of gene ontology (GO) and pathways.

Sheet S1a- *M. tb* H37Rv-infected hBM-MSCs versus uninfected hBM-MSCs control (Rv Vs UI)

Sheet S1b - *M. tb* H37Ra-infected hBM-MSCs versus uninfected hBM-MSCs control (Ra Vs UI)

Sheet S1c - *M. tb* H37Rv-infected hBM-MSCs versus *M. tb* H37Ra-infected hBM-MSCs (Rv Vs Ra- **S2c**).
