# Supplementary material for: Global proteomics reveals pathways of mesenchymal stem cells altered by Mycobacterium tuberculosis.
Source: Research Square preprint supplement (doi:10.21203/rs.3.rs-4179764/v1), 2024-08-29
Supplement: Supplementary file 2 [file 3a6c870e0817fdf7a5d58089.xlsx]

## Sheet: Sheet1
Category	Term	Count	%	P value	Genes	List Total	Pop Hits	Pop Total	Fold Enrichment	Bonferroni	Benjamini	FDR
UP_KEYWORDS	Signal	34	28.3333	0.029906	SCARB2, CXCL6, CXCL8, ITGB5, COL12A1, FBLN1, CXCL1, AEBP1, THBS2, NID2, UQCRH, CTGF, IL4I1, CLEC3B, OXCT1, ADAMTS1, RNPEP, PDDC1, SDF2, TPBG, TMED7-TICAM2, HLA-B, EPDR1, LAMB1, INHBA, P3H3, SLC39A14, GREM1, CXCL10, MMP13, COL1A2, COL5A1, MSRB2, MCU	120	4160	20581	1.40175	0.998665	0.331263	0.317587
GOTERM_CC_DIRECT	GO:0005615~extracellular space	23	19.1667	4.13426e-05	CXCL6, CXCL8, TFRC, GSTP1, COL12A1, TNFAIP2, CXCL1, LAMB1, FBLN1, AEBP1, ACTB, CTGF, SERPINB6, GREM1, CXCL10, CLEC3B, MMP13, COL1A2, GNB2, RNPEP, CD9, LCP1, SDF2	118	1347	18224	2.63707	0.00864455	0.00289398	0.00276995
UP_KEYWORDS	Secreted	23	19.1667	0.00187483	CXCL6, CXCL8, TFRC, COL12A1, EPDR1, CXCL1, LAMB1, FBLN1, AEBP1, INHBA, NID2, CTGF, GREM1, CXCL10, CLEC3B, MMP13, AKR1B10, COL1A2, COL5A1, ADAMTS1, RNPEP, PDDC1, SDF2	120	1965	20581	2.00748	0.335751	0.0454127	0.0435378
GOTERM_CC_DIRECT	GO:0005576~extracellular region	19	15.8333	0.0142254	CXCL6, CXCL8, TFRC, COL12A1, EPDR1, CXCL1, LAMB1, FBLN1, INHBA, THBS2, NID2, CTGF, IL4I1, CXCL10, CLEC3B, MMP13, COL1A2, COL5A1, RNPEP	118	1610	18224	1.82259	0.950649	0.229795	0.219947
GOTERM_CC_DIRECT	GO:0005739~mitochondrion	19	15.8333	0.00203732	NDUFA8, GPX1, GSTP1, STXBP1, PYCR2, UQCRH, HCFC1, LETM1, PPP3R1, ZADH2, OXCT1, IVD, MSRB2, PDK3, ABCE1, SLC25A4, SLC25A11, MCU, BCAT2	118	1331	18224	2.20464	0.348367	0.0534797	0.0511877
UP_KEYWORDS	Mitochondrion	15	12.5	0.00523171	NDUFA8, GSTP1, PYCR2, UQCRH, LETM1, OXCT1, IVD, MSRB2, RPS3, PDK3, ABCE1, SLC25A4, SLC25A11, MCU, BCAT2	120	1119	20581	2.29904	0.6813	0.0778413	0.0746277
GOTERM_CC_DIRECT	GO:0031012~extracellular matrix	13	10.8333	4.52886e-07	COL12A1, LAMB1, FBLN1, AEBP1, THBS2, NID2, CLEC3B, MMP13, HNRNPK, COL1A2, COL5A1, RPS18, RPS3	118	296	18224	6.78287	9.51016e-05	4.7553e-05	4.55151e-05
UP_KEYWORDS	RNA-binding	12	10	0.0016546	SRRM2, HNRNPK, FXR2, DDX46, RPS18, MARS, TRA2A, SRSF2, RPS3, RNPS1, EIF4G3, SRSF11	120	665	20581	3.09489	0.303022	0.0454127	0.0435378
GOTERM_CC_DIRECT	GO:0005794~Golgi apparatus	11	9.16667	0.0509067	MACF1, TMEM43, GDI1, HSPB8, TMED7-TICAM2, HLA-B, AP3D1, COG1, VPS45, SLC39A14, CTGF	118	863	18224	1.96854	0.999983	0.505509	0.483845
UP_KEYWORDS	Extracellular matrix	9	7.5	0.000129453	MMP13, COL1A2, COL5A1, ADAMTS1, COL12A1, FBLN1, LAMB1, NID2, CTGF	120	258	20581	5.98285	0.027828	0.00705517	0.0067639
GOTERM_BP_DIRECT	GO:0007155~cell adhesion	9	7.5	0.0143038	COL5A1, ITGB5, TPBG, COL12A1, CD9, LAMB1, THBS2, NID2, CTGF	117	459	16792	2.81414	0.999995	0.966673	0.966673
UP_KEYWORDS	Protein transport	9	7.5	0.0253735	ATG3, STXBP1, TMED7-TICAM2, RAB18, AP3D1, COG1, VPS26A, VPS45, VPS36	120	610	20581	2.53045	0.996313	0.325378	0.311945
GOTERM_CC_DIRECT	GO:0005759~mitochondrial matrix	8	6.66667	0.00518142	GPX1, OXCT1, IVD, RPS3, PDK3, PYCR2, ABCE1, BCAT2	118	327	18224	3.77837	0.664095	0.10881	0.104146
KEGG_PATHWAY	hsa04151:PI3K-Akt signaling pathway	8	6.66667	0.0494912	COL1A2, COL5A1, ITGB5, CDK4, GNB2, PPP2R2A, LAMB1, THBS2	68	345	6879	2.34578	0.999745	0.977194	0.971199
UP_KEYWORDS	mRNA processing	8	6.66667	0.00320231	SRRM2, HNRNPK, DDX46, TRA2A, SRSF2, ZNF326, RNPS1, SRSF11	120	332	20581	4.13273	0.503029	0.0634639	0.0608438
UP_KEYWORDS	mRNA splicing	8	6.66667	0.000797889	SRRM2, HNRNPK, DDX46, TRA2A, SRSF2, ZNF326, RNPS1, SRSF11	120	260	20581	5.27718	0.159711	0.034788	0.0333518
UP_KEYWORDS	Transit peptide	8	6.66667	0.0361948	LETM1, OXCT1, IVD, MSRB2, PDK3, MCU, UQCRH, BCAT2	120	536	20581	2.55983	0.999677	0.358658	0.343851
GOTERM_BP_DIRECT	GO:0000398~mRNA splicing, via spliceosome	7	5.83333	0.00443245	SRRM2, HNRNPK, DDX46, TRA2A, SRSF2, RNPS1, SRSF11	117	222	16792	4.52545	0.976777	0.801553	0.801553
GOTERM_BP_DIRECT	GO:0006413~translational initiation	7	5.83333	0.000376091	EIF5B, RPS27, RPS18, RPS3, ABCE1, EIF4G3, EIF4G2	117	137	16792	7.33321	0.27284	0.318549	0.318549
UP_KEYWORDS	Mitochondrion inner membrane	7	5.83333	0.00486899	LETM1, NDUFA8, RPS3, SLC25A11, SLC25A4, MCU, UQCRH	120	270	20581	4.44651	0.654938	0.0778413	0.0746277
GOTERM_MF_DIRECT	GO:0003735~structural constituent of ribosome	6	5	0.0173791	RPS27, RPS18, RPS3, RPL22L1, SLC25A11, SLC25A4	115	222	16881	3.96733	0.991508	0.787853	0.784956
GOTERM_CC_DIRECT	GO:0005578~proteinaceous extracellular matrix	6	5	0.0293723	MMP13, COL1A2, COL5A1, ADAMTS1, FBLN1, CTGF	118	268	18224	3.45763	0.99809	0.385512	0.36899
GOTERM_CC_DIRECT	GO:0005604~basement membrane	6	5	0.000154462	COL5A1, ADAMTS1, FBLN1, LAMB1, THBS2, NID2	118	79	18224	11.7297	0.031919	0.00810926	0.00776172
GOTERM_CC_DIRECT	GO:0005913~cell-cell adherens junction	6	5	0.0572801	LYPLA2, MACF1, HNRNPK, PACSIN2, EIF4G2, HCFC1	118	323	18224	2.86887	0.999996	0.505509	0.483845
GOTERM_BP_DIRECT	GO:0006412~translation	6	5	0.0310759	RPS27, RPS18, RPS3, RPL22L1, SLC25A11, SLC25A4	117	253	16792	3.40367	1	1	1
GOTERM_BP_DIRECT	GO:0030198~extracellular matrix organization	6	5	0.0116369	COL1A2, COL5A1, ITGB5, FBLN1, LAMB1, NID2	117	196	16792	4.39351	0.999951	0.966673	0.966673
GOTERM_BP_DIRECT	GO:0098609~cell-cell adhesion	6	5	0.0399163	LYPLA2, MACF1, HNRNPK, PACSIN2, EIF4G2, HCFC1	117	271	16792	3.17759	1	1	1
GOTERM_MF_DIRECT	GO:0098641~cadherin binding involved in cell-cell adhesion	6	5	0.0468589	LYPLA2, MACF1, HNRNPK, PACSIN2, EIF4G2, HCFC1	115	290	16881	3.03706	0.999998	1	1
KEGG_PATHWAY	hsa04510:Focal adhesion	6	5	0.0496094	COL1A2, COL5A1, ITGB5, LAMB1, THBS2, ACTB	68	206	6879	2.94646	0.99975	0.977194	0.971199
REACTOME_PATHWAY	R-HSA-72163:R-HSA-72163	6	5	0.0261343	SRRM2, HNRNPK, DDX46, SRSF2, RNPS1, SRSF11	87	177	9075	3.53594	0.998216	0.903936	0.903936
REACTOME_PATHWAY	R-HSA-975957:R-HSA-975957	6	5	0.00461486	RPS27, RPS18, RPS3, PPP2R2A, RPL22L1, RNPS1	87	115	9075	5.44228	0.668956	0.903936	0.903936
UP_KEYWORDS	Collagen	5	4.16667	0.00252633	MMP13, COL1A2, COL5A1, RPS18, COL12A1	120	98	20581	8.75043	0.423879	0.055074	0.0528003
UP_KEYWORDS	Cytokine	5	4.16667	0.0245893	GREM1, CXCL6, CXCL10, CXCL8, CXCL1	120	190	20581	4.51338	0.995606	0.325378	0.311945
GOTERM_BP_DIRECT	GO:0000184~nuclear-transcribed mRNA catabolic process, nonsense-mediated decay	5	4.16667	0.00933931	RPS27, RPS18, RPS3, PPP2R2A, RNPS1	117	119	16792	6.03031	0.999646	0.966673	0.966673
GOTERM_CC_DIRECT	GO:0005581~collagen trimer	5	4.16667	0.00291998	MMP13, COL1A2, COL5A1, RPS18, COL12A1	118	92	18224	8.39352	0.458869	0.0681329	0.0652129
GOTERM_CC_DIRECT	GO:0043209~myelin sheath	5	4.16667	0.0166775	GDI1, STXBP1, GNB2, SLC25A4, ACTB	118	152	18224	5.08029	0.970748	0.250163	0.239442
KEGG_PATHWAY	hsa04512:ECM-receptor interaction	5	4.16667	0.00998856	COL1A2, COL5A1, ITGB5, LAMB1, THBS2	68	87	6879	5.81389	0.805305	0.429917	0.427279
KEGG_PATHWAY	hsa05146:Amoebiasis	5	4.16667	0.0194383	CXCL8, COL1A2, COL5A1, LAMB1, SERPINB6	68	106	6879	4.77178	0.959223	0.528075	0.524835
REACTOME_PATHWAY	R-HSA-72706:R-HSA-72706	5	4.16667	0.0234693	EIF5B, RPS27, RPS18, RPS3, RPL22L1	87	115	9075	4.53523	0.996573	0.903936	0.903936
UP_SEQ_FEATURE	domain:RRM	4	3.33333	0.0454762	TRA2A, SRSF2, RNPS1, SRSF11	119	135	20063	4.99546	1	1	1
GOTERM_MF_DIRECT	GO:0005201~extracellular matrix structural constituent	4	3.33333	0.0105026	COL1A2, COL5A1, FBLN1, LAMB1	115	67	16881	8.76366	0.943404	0.571342	0.569241
GOTERM_BP_DIRECT	GO:0006935~chemotaxis	4	3.33333	0.0525094	CXCL6, CXCL10, CXCL8, CXCL1	117	122	16792	4.70562	1	1	1
GOTERM_MF_DIRECT	GO:0008009~chemokine activity	4	3.33333	0.00440891	CXCL6, CXCL10, CXCL8, CXCL1	115	49	16881	11.983	0.69937	0.299806	0.298703
GOTERM_BP_DIRECT	GO:0030199~collagen fibril organization	4	3.33333	0.00244916	GREM1, COL1A2, COL5A1, COL12A1	117	39	16792	14.7201	0.874693	0.691481	0.691481
GOTERM_BP_DIRECT	GO:0030574~collagen catabolic process	4	3.33333	0.0098567	MMP13, COL1A2, COL5A1, COL12A1	117	64	16792	8.97009	0.999773	0.966673	0.966673
GOTERM_BP_DIRECT	GO:0060326~cell chemotaxis	4	3.33333	0.0102824	CXCL6, CXCL10, RHOG, CXCL1	117	65	16792	8.83208	0.999842	0.966673	0.966673
GOTERM_BP_DIRECT	GO:0070098~chemokine-mediated signaling pathway	4	3.33333	0.0130599	CXCL6, CXCL10, CXCL8, CXCL1	117	71	16792	8.08571	0.999985	0.966673	0.966673
GOTERM_BP_DIRECT	GO:0071222~cellular response to lipopolysaccharide	4	3.33333	0.0435105	CXCL10, CXCL8, GSTP1, TMED7-TICAM2	117	113	16792	5.0804	1	1	1
KEGG_PATHWAY	hsa04974:Protein digestion and absorption	4	3.33333	0.0539555	COL1A2, COL5A1, COL12A1, ATP1B3	68	88	6879	4.59826	0.999882	0.977194	0.971199
UP_KEYWORDS	Inflammatory response	4	3.33333	0.0582322	CXCL10, CXCL8, TMED7-TICAM2, CXCL1	120	152	20581	4.51338	0.999998	0.448848	0.430318
UP_KEYWORDS	Protein biosynthesis	4	3.33333	0.0582322	EIF5B, MARS, EIF4G3, EIF4G2	120	152	20581	4.51338	0.999998	0.448848	0.430318
REACTOME_PATHWAY	R-HSA-1442490:R-HSA-1442490	4	3.33333	0.0226098	MMP13, COL1A2, COL5A1, COL12A1	87	64	9075	6.5194	0.995771	0.903936	0.903936
REACTOME_PATHWAY	R-HSA-156902:R-HSA-156902	4	3.33333	0.0550496	RPS27, RPS18, RPS3, RPL22L1	87	91	9075	4.58507	0.999999	0.959082	0.959082
REACTOME_PATHWAY	R-HSA-1650814:R-HSA-1650814	4	3.33333	0.0254782	COL1A2, COL5A1, COL12A1, P3H3	87	67	9075	6.22748	0.997905	0.903936	0.903936
REACTOME_PATHWAY	R-HSA-192823:R-HSA-192823	4	3.33333	0.0550496	RPS27, RPS18, RPS3, RPL22L1	87	91	9075	4.58507	0.999999	0.959082	0.959082
REACTOME_PATHWAY	R-HSA-3000178:R-HSA-3000178	4	3.33333	0.0340394	COL1A2, COL5A1, ITGB5, LAMB1	87	75	9075	5.56322	0.999746	0.903936	0.903936
REACTOME_PATHWAY	R-HSA-380108:R-HSA-380108	4	3.33333	0.018245	CXCL6, CXCL10, CXCL8, CXCL1	87	59	9075	7.07189	0.987733	0.903936	0.903936
BBID	109.Chemokine_families	3	2.5	0.0588379	CXCL6, CXCL10, CXCL8	7	27	388	6.15873	0.643306	0.941406	0.941406
UP_KEYWORDS	Charcot-Marie-Tooth disease	3	2.5	0.0351627	HSPB8, MARS, PDK3	120	51	20581	10.0887	0.999592	0.358658	0.343851
GOTERM_BP_DIRECT	GO:0006405~RNA export from nucleus	3	2.5	0.0554283	SRSF2, RNPS1, SRSF11	117	55	16792	7.82844	1	1	1
GOTERM_BP_DIRECT	GO:0006446~regulation of translational initiation	3	2.5	0.0255808	EIF5B, EIF4G3, EIF4G2	117	36	16792	11.9601	1	1	1
GOTERM_CC_DIRECT	GO:0022627~cytosolic small ribosomal subunit	3	2.5	0.0380539	RPS27, RPS18, RPS3	118	48	18224	9.65254	0.99971	0.470078	0.449931
GOTERM_BP_DIRECT	GO:0031124~mRNA 3'-end processing	3	2.5	0.0467441	SRSF2, RNPS1, SRSF11	117	50	16792	8.61128	1	1	1
UP_KEYWORDS	Host cell receptor for virus entry	3	2.5	0.0529853	SCARB2, ITGB5, TFRC	120	64	20581	8.03945	0.999993	0.448848	0.430318
UP_KEYWORDS	Initiation factor	3	2.5	0.0444192	EIF5B, EIF4G3, EIF4G2	120	58	20581	8.87112	0.99995	0.421017	0.403636
REACTOME_PATHWAY	R-HSA-3000170:R-HSA-3000170	3	2.5	0.0267256	COL1A2, COL5A1, ITGB5	87	27	9075	11.59	0.998457	0.903936	0.903936
REACTOME_PATHWAY	R-HSA-3000171:R-HSA-3000171	3	2.5	0.0548952	COL1A2, COL5A1, LAMB1	87	40	9075	7.82328	0.999999	0.959082	0.959082
