# Supplementary material for: Global proteomics reveals pathways of mesenchymal stem cells altered by Mycobacterium tuberculosis.
Source: Research Square preprint supplement (doi:10.21203/rs.3.rs-4179764/v1), 2024-08-29
Supplement: Supplementary file 3 [file 5214b39f74a0a3d14b7f4216.xlsx]

## Sheet: Rv_Vs_UI
Category	Term	Count	%	P value	Genes	List Total	Pop Hits	Pop Total	Fold Enrichment	Bonferroni	Benjamini	FDR
UP_KEYWORDS	Membrane	77	43.5028	0.0373321	SCARB2, FKBP11, ITGB5, TFRC, PDCD6, CISD2, PLOD2, MRC2, ABHD12, SEC61A1, AIFM1, TMEM43, ADAMTS1, NNT, TOM1, FLOT2, CHP1, VPS35, SEPHS1, TMPO, SEC63, IKBIP, LYPLA1, DDX58, EXOC7, ACTN1, SACM1L, RHOG, AP1B1, GPX8, COG1, SDHC, EPS15L1, FNDC3A, C15ORF48, PLA2G15, TMX3, MMP13, MYADM, PIGK, TLN2, MFGE8, SEC22B, SLC25A4, GART, SLC25A6, COLEC12, MACF1, RAB5B, RAB5C, CNP, RRAD, PTTG1IP, TM9SF3, PPP3R1, UB…	177	7494	20581	1.19473	0.999953	0.290011	0.266765
UP_KEYWORDS	Signal	52	29.3785	0.0033793	SCARB2, FKBP11, CXCL6, POGLUT1, CXCL8, ITGB5, CTSZ, CXCL1, PLOD2, CTGF, MRC2, IL4I1, ADAMTS1, RNPEP, RAC2, EXOC7, APOA1, PCOLCE, GREM1, PLA2G15, RCN2, TMX3, MMP13, PIGK, MFGE8, ITIH2, FBLN1, AEBP1, PTTG1IP, THBS2, NID2, LTBP1, TM9SF3, VTN, CLEC3B, DNPEP, IGFBP7, CD59, TFPI2, TMED7-TICAM2, APOC3, LAMB1, INHBA, COL1A1, CXCL10, COL3A1, BMP1, COL1A2, PTK7, ITGA11, MCU, FBN1	177	4160	20581	1.45346	0.588059	0.0402444	0.0370187
UP_SEQ_FEATURE	signal peptide	46	25.9887	0.00104082	FKBP11, CXCL6, POGLUT1, ITIH2, CXCL8, ITGB5, CTSZ, FBLN1, CXCL1, PLOD2, AEBP1, PTTG1IP, THBS2, NID2, LTBP1, CTGF, TM9SF3, MRC2, VTN, IL4I1, CLEC3B, AIFM1, ADAMTS1, CD59, IGFBP7, TFPI2, APOA1, APOC3, LAMB1, PCOLCE, INHBA, GREM1, PLA2G15, COL1A1, CXCL10, COL3A1, RCN2, BMP1, TMX3, MMP13, COL1A2, PTK7, ITGA11, PIGK, MFGE8, FBN1	173	3346	20063	1.59434	0.572925	0.292177	0.29182
UP_KEYWORDS	Disulfide bond	42	23.7288	0.0144784	COLEC12, SCARB2, CXCL6, ITIH2, CXCL8, ITGB5, TFRC, CTSZ, FBLN1, CXCL1, THBS2, NID2, LTBP1, CTGF, MRC2, VTN, IL4I1, CLEC3B, PITRM1, ADAMTS1, CD59, IGFBP7, GALNT2, TFPI2, LAMB1, PCOLCE, INHBA, GREM1, PLA2G15, COL1A1, CXCL10, COL3A1, BMP1, TMX3, MMP13, COL1A2, PTK7, ITGA11, PIGK, CHCHD2P9, MFGE8, FBN1	177	3434	20581	1.42214	0.978096	0.145898	0.134204
UP_KEYWORDS	Secreted	35	19.774	5.28539e-05	CXCL6, ITIH2, CXCL8, TFRC, FBLN1, CXCL1, AEBP1, NID2, LTBP1, CTGF, VTN, CLEC3B, ADAMTS1, RNPEP, CD59, IGFBP7, GALNT2, TFPI2, APOA1, APOC3, IL36G, LAMB1, PCOLCE, INHBA, GREM1, PLA2G15, COL1A1, CXCL10, COL3A1, BMP1, MMP13, COL1A2, IL1B, MFGE8, FBN1	177	1965	20581	2.07109	0.0137526	0.00295513	0.00271827
GOTERM_CC_DIRECT	GO:0005615~extracellular space	34	19.209	5.21408e-07	CXCL6, CXCL8, CNP, TFRC, CTSZ, FBLN1, CXCL1, AEBP1, ACTB, CTGF, VTN, CLEC3B, RNPEP, HMOX1, CD59, IGFBP7, SERPINB4, ACTN1, APOA1, APOC3, IL36G, LAMB1, PCOLCE, GREM1, PLA2G15, COL1A1, CXCL10, COL3A1, BMP1, MMP13, COL1A2, IL1B, MFGE8, FBN1	176	1347	18224	2.61362	0.000137121	3.11968e-05	2.90617e-05
GOTERM_CC_DIRECT	GO:0005576~extracellular region	31	17.5141	0.000318954	CXCL6, ITIH2, CXCL8, TFRC, FBLN1, CXCL1, THBS2, NID2, LTBP1, CTGF, VTN, IL4I1, CLEC3B, RNPEP, IGFBP7, APOL2, ACTN1, APOA1, APOC3, IL36G, LAMB1, INHBA, COL1A1, CXCL10, COL3A1, BMP1, MMP13, COL1A2, IL1B, MFGE8, FBN1	176	1610	18224	1.99373	0.0804753	0.0083885	0.00781438
UP_KEYWORDS	Mitochondrion	18	10.1695	0.0155937	NDUFA4, MRPS23, CISD2, PYCR1, SDHC, DYNLL1, MAPK10, LETM1, PITRM1, AIFM1, NNT, PPIF, CMPK2, CHCHD2P9, SLC25A4, MCU, SLC25A6, BCAT2	177	1119	20581	1.8704	0.983719	0.151317	0.139188
GOTERM_MF_DIRECT	GO:0005509~calcium ion binding	17	9.60452	0.00307835	MACF1, PDCD6, ACTN1, FBLN1, EPS15L1, THBS2, NID2, LTBP1, LETM1, CLEC3B, MYL6, PPP3R1, MMP13, RCN2, BMP1, CHP1, FBN1	175	717	16881	2.28712	0.66735	0.122108	0.119714
UP_KEYWORDS	Lipoprotein	17	9.60452	0.00270868	RAB5B, RAB5C, CNP, TFRC, TMED7-TICAM2, RHOG, APOA1, APOC3, MAPK10, PPP3R1, RAB18, RAC2, FLOT2, CHP1, CD59, GBP2, APOL2	177	852	20581	2.32008	0.508669	0.0373512	0.0343574
KEGG_PATHWAY	hsa04510:Focal adhesion	14	7.9096	5.41749e-06	ITGB5, ACTN1, LAMB1, THBS2, ACTB, MAPK10, COL1A1, VTN, COL3A1, COL1A2, ITGA11, RAC2, TLN2, MAPK3	98	206	6879	4.77046	0.0010288	0.00102932	0.000985982
UP_KEYWORDS	Cell adhesion	13	7.34463	0.000885658	CYFIP2, ITGB5, FBLIM1, LAMB1, THBS2, NID2, CTGF, VTN, PTK7, ITGA11, FLOT2, IGFBP7, MFGE8	177	479	20581	3.15574	0.207169	0.0178494	0.0164187
GOTERM_BP_DIRECT	GO:0007155~cell adhesion	13	7.34463	0.00263913	ITGB5, LAMB1, THBS2, NID2, CTGF, COL1A1, VTN, PTK7, ITGA11, FLOT2, IGFBP7, TLN2, MFGE8	172	459	16792	2.76506	0.953366	0.306139	0.304819
GOTERM_CC_DIRECT	GO:0005743~mitochondrial inner membrane	12	6.77966	0.00363352	LETM1, CNP, AIFM1, NDUFA4, NNT, MRPS23, STAT3, PPIF, SDHC, SLC25A4, MCU, SLC25A6	176	441	18224	2.81756	0.616093	0.0637077	0.0593475
GOTERM_BP_DIRECT	GO:0006508~proteolysis	12	6.77966	0.0135372	MMP13, BMP1, DNPEP, PITRM1, XPNPEP1, ADAMTS1, PDCD6, CTSZ, RNPEP, PIGK, TPP2, PCOLCE	172	500	16792	2.34307	1	0.828505	0.824934
UP_KEYWORDS	Extracellular matrix	11	6.21469	7.89538e-05	COL1A1, COL3A1, MMP13, BMP1, COL1A2, ADAMTS1, FBLN1, LAMB1, NID2, CTGF, FBN1	177	258	20581	4.95754	0.0204742	0.00295513	0.00271827
GOTERM_BP_DIRECT	GO:0007264~small GTPase mediated signal transduction	11	6.21469	0.00021777	RAB5B, RAB5C, GDI1, RRAD, RAP1GDS1, RAB18, RHOG, RAC2, HMOX1, SRPRB, CHP1	172	246	16792	4.36548	0.223253	0.0683577	0.068063
GOTERM_BP_DIRECT	GO:0030198~extracellular matrix organization	11	6.21469	3.30517e-05	COL1A1, VTN, COL3A1, COL1A2, ITGB5, ITGA11, FBLN1, LAMB1, NID2, NFKB2, FBN1	172	196	16792	5.47912	0.037615	0.03834	0.0381748
UP_KEYWORDS	Protease	11	6.21469	0.0188794	PSMB7, MMP13, BMP1, DNPEP, PITRM1, XPNPEP1, ADAMTS1, CTSZ, RNPEP, PIGK, TPP2	177	544	20581	2.35119	0.993219	0.170565	0.156894
GOTERM_BP_DIRECT	GO:0006954~inflammatory response	10	5.64972	0.0157546	CXCL6, CXCL10, CXCL8, IFI16, IL1B, TOLLIP, TMED7-TICAM2, IL36G, CXCL1, NFKB2	172	379	16792	2.57593	1	0.870256	0.866505
KEGG_PATHWAY	hsa04151:PI3K-Akt signaling pathway	10	5.64972	0.0535222	COL1A1, VTN, COL3A1, COL1A2, ITGB5, ITGA11, PPP2R2A, LAMB1, THBS2, MAPK3	98	345	6879	2.03461	0.999971	0.44214	0.423523
UP_KEYWORDS	Transit peptide	10	5.64972	0.0413425	LETM1, PITRM1, AIFM1, NNT, PPIF, CMPK2, SDHC, CHCHD2P9, MCU, BCAT2	177	536	20581	2.16934	0.999984	0.290011	0.266765
GOTERM_MF_DIRECT	GO:0005525~GTP binding	9	5.08475	0.0457743	RAB5B, RAB5C, RRAD, RAB18, RHOG, RAC2, SRPRB, SEPHS1, GBP2	175	384	16881	2.26085	1	0.794239	0.778665
GOTERM_CC_DIRECT	GO:0005578~proteinaceous extracellular matrix	9	5.08475	0.00442752	MMP13, BMP1, COL1A2, ADAMTS1, TFPI2, FBLN1, LTBP1, CTGF, FBN1	176	268	18224	3.47727	0.688708	0.0727774	0.0677964
KEGG_PATHWAY	hsa05164:Influenza A	9	5.08475	0.00303789	MAPK10, IFIH1, CXCL10, CXCL8, DDX58, IL1B, EIF2AK2, ACTB, MAPK3	98	174	6879	3.63072	0.439024	0.0721498	0.0691119
UP_KEYWORDS	Cytokine	8	4.51977	0.00126812	GREM1, CXCL6, CXCL10, CXCL8, BMP1, IL1B, IL36G, CXCL1	177	190	20581	4.89587	0.282841	0.0221498	0.0203744
GOTERM_MF_DIRECT	GO:0003924~GTPase activity	8	4.51977	0.0108407	RAB5B, RAB5C, RRAD, ARHGDIB, RAB18, RHOG, RAC2, GBP2	175	234	16881	3.29788	0.97958	0.32251	0.316186
GOTERM_CC_DIRECT	GO:0005913~cell-cell adherens junction	8	4.51977	0.0366899	CNN2, MACF1, LARP1, FLOT2, EPS15L1, EIF4G2, TMPO, HCFC1	176	323	18224	2.56459	0.999946	0.344623	0.321037
GOTERM_BP_DIRECT	GO:0007267~cell-cell signaling	8	4.51977	0.0153379	GREM1, CXCL6, CXCL10, IL1B, TOLLIP, IL36G, INHBA, CTGF	172	254	16792	3.07489	1	0.870256	0.866505
UP_KEYWORDS	GTP-binding	8	4.51977	0.0287319	RAB5B, RAB5C, RRAD, RAB18, RHOG, RAC2, SRPRB, GBP2	177	343	20581	2.712	0.999518	0.235242	0.216387
KEGG_PATHWAY	hsa04512:ECM-receptor interaction	8	4.51977	0.000207562	COL1A1, VTN, COL3A1, COL1A2, ITGB5, ITGA11, LAMB1, THBS2	98	87	6879	6.45461	0.0386732	0.00788735	0.00755525
KEGG_PATHWAY	hsa05132:Salmonella infection	8	4.51977	0.000154398	MAPK10, DYNC1I2, CXCL8, IL1B, RHOG, CXCL1, ACTB, MAPK3	98	83	6879	6.76567	0.0289117	0.0073339	0.0070251
UP_KEYWORDS	Inflammatory response	8	4.51977	0.000337271	CXCL10, CXCL8, IFI16, IL1B, TOLLIP, TMED7-TICAM2, IL36G, CXCL1	177	152	20581	6.11983	0.0845869	0.00972055	0.00894142
UP_KEYWORDS	Mitochondrion inner membrane	8	4.51977	0.00869984	LETM1, AIFM1, NDUFA4, NNT, SDHC, SLC25A4, MCU, SLC25A6	177	270	20581	3.44524	0.898666	0.0911743	0.0838665
UP_SEQ_FEATURE	nucleotide phosphate-binding region:GTP	8	4.51977	0.0178737	RAB5B, RAB5C, RRAD, RAB18, RHOG, RAC2, SRPRB, GBP2	173	310	20063	2.9928	1	0.731034	0.73014
UP_SEQ_FEATURE	domain:EF-hand 1	7	3.9548	0.00528829	MACF1, MYL6, PPP3R1, RCN2, PDCD6, ACTN1, CHP1	173	185	20063	4.3881	0.986859	0.432582	0.432054
UP_SEQ_FEATURE	domain:EF-hand 2	7	3.9548	0.00528829	MACF1, MYL6, PPP3R1, RCN2, PDCD6, ACTN1, CHP1	173	185	20063	4.3881	0.986859	0.432582	0.432054
UP_KEYWORDS	EGF-like domain	7	3.9548	0.0167978	BMP1, FBLN1, MFGE8, THBS2, LTBP1, NID2, FBN1	177	238	20581	3.41991	0.988185	0.15718	0.144581
GOTERM_MF_DIRECT	GO:0005201~extracellular matrix structural constituent	7	3.9548	6.523e-05	COL1A1, COL3A1, COL1A2, TFPI2, FBLN1, LAMB1, FBN1	175	67	16881	10.0782	0.0230188	0.00776237	0.00761016
GOTERM_BP_DIRECT	GO:0030168~platelet activation	7	3.9548	0.00115071	COL1A1, COL3A1, COL1A2, ACTN1, RHOG, RAC2, MAPK3	172	115	16792	5.94257	0.736997	0.22247	0.221511
GOTERM_BP_DIRECT	GO:0098609~cell-cell adhesion	7	3.9548	0.0590965	CNN2, MACF1, LARP1, EPS15L1, EIF4G2, TMPO, HCFC1	172	271	16792	2.52175	1	1	0.996549
KEGG_PATHWAY	hsa04062:Chemokine signaling pathway	7	3.9548	0.0470456	CXCL6, CXCL10, CXCL8, STAT3, RAC2, CXCL1, MAPK3	98	186	6879	2.64171	0.999894	0.425651	0.407729
KEGG_PATHWAY	hsa05152:Tuberculosis	7	3.9548	0.0384314	MAPK10, MRC2, RAB5B, PPP3R1, RAB5C, IL1B, MAPK3	98	177	6879	2.77603	0.999416	0.405665	0.388585
KEGG_PATHWAY	hsa05160:Hepatitis C	7	3.9548	0.010969	MAPK10, CXCL8, DDX58, STAT3, EIF2AK2, PPP2R2A, MAPK3	98	133	6879	3.69441	0.877007	0.189465	0.181487
KEGG_PATHWAY	hsa05168:Herpes simplex infection	7	3.9548	0.0440513	MAPK10, IFIH1, DDX58, IL1B, SRSF2, EIF2AK2, HCFC1	98	183	6879	2.68501	0.999808	0.418487	0.400867
UP_KEYWORDS	Innate immunity	7	3.9548	0.0251353	IFIH1, IFI16, DDX58, TOLLIP, TMED7-TICAM2, EIF2AK2, IL36G	177	261	20581	3.11854	0.998731	0.219515	0.20192
UP_KEYWORDS	Metalloprotease	7	3.9548	0.00197738	MMP13, BMP1, DNPEP, PITRM1, XPNPEP1, ADAMTS1, RNPEP	177	152	20581	5.35485	0.404638	0.0287818	0.0264749
UP_KEYWORDS	Prenylation	7	3.9548	0.00324641	RAB5B, RAB5C, CNP, RAB18, RHOG, RAC2, GBP2	177	168	20581	4.84487	0.573415	0.0402444	0.0370187
REACTOME_PATHWAY	R-HSA-216083:R-HSA-216083	7	3.9548	0.00071553	COL1A1, VTN, COL3A1, COL1A2, ITGB5, ITGA11, FBN1	115	86	9075	6.42315	0.185703	0.0513392	0.0506237
REACTOME_PATHWAY	R-HSA-6807878:R-HSA-6807878	7	3.9548	0.00141852	DYNC1I2, DCTN4, TMED7-TICAM2, COG1, CD59, COPG2, DYNLL1	115	98	9075	5.63665	0.334625	0.0610294	0.0601788
UP_KEYWORDS	Collagen	6	3.38983	0.00154516	COLEC12, COL1A1, COL3A1, MMP13, COL1A2, PCOLCE	177	98	20581	7.11899	0.333119	0.0253019	0.0232739
GOTERM_BP_DIRECT	GO:0001501~skeletal system development	6	3.38983	0.0131393	COL1A1, COL3A1, BMP1, COL1A2, AEBP1, FBN1	172	137	16792	4.27567	1	0.828505	0.824934
GOTERM_CC_DIRECT	GO:0005581~collagen trimer	6	3.38983	0.00193374	COLEC12, COL1A1, COL3A1, MMP13, COL1A2, PCOLCE	176	92	18224	6.75296	0.398943	0.0391211	0.0364436
GOTERM_BP_DIRECT	GO:0007160~cell-matrix adhesion	6	3.38983	0.00226029	VTN, COL3A1, ITGB5, ITGA11, NID2, CTGF	172	90	16792	6.50853	0.927554	0.306139	0.304819
KEGG_PATHWAY	hsa04611:Platelet activation	6	3.38983	0.0361641	COL1A1, COL3A1, COL1A2, TLN2, ACTB, MAPK3	98	130	6879	3.23972	0.999087	0.404186	0.387168
KEGG_PATHWAY	hsa04620:Toll-like receptor signaling pathway	6	3.38983	0.0166295	MAPK10, CXCL10, CXCL8, IL1B, TOLLIP, MAPK3	98	106	6879	3.97324	0.95867	0.243046	0.232813
KEGG_PATHWAY	hsa04622:RIG-I-like receptor signaling pathway	6	3.38983	0.0029504	MAPK10, IFIH1, CXCL10, CXCL8, DDX58, PIN1	98	70	6879	6.01662	0.429592	0.0721498	0.0691119
KEGG_PATHWAY	hsa04962:Vasopressin-regulated water reabsorption	6	3.38983	0.000353189	DYNC1I2, RAB5B, RAB5C, DCTN4, ARHGDIB, DYNLL1	98	44	6879	9.57189	0.064915	0.0111843	0.0107134
KEGG_PATHWAY	hsa05161:Hepatitis B	6	3.38983	0.0535091	MAPK10, IFIH1, CXCL8, DDX58, STAT3, MAPK3	98	145	6879	2.90457	0.999971	0.44214	0.423523
UP_SEQ_FEATURE	lipid moiety-binding region:S-geranylgeranyl cysteine	6	3.38983	0.00239219	RAB5B, RAB5C, RAB18, RHOG, RAC2, GBP2	173	108	20063	6.44284	0.858685	0.391363	0.390884
UP_SEQ_FEATURE	propeptide:Removed in mature form	6	3.38983	0.0535373	PSMB7, RAB18, RHOG, RAC2, CD59, GBP2	173	237	20063	2.93598	1	1	1
REACTOME_PATHWAY	R-HSA-1650814:R-HSA-1650814	6	3.38983	0.00148852	COL1A1, COL3A1, BMP1, COL1A2, PLOD2, PCOLCE	115	67	9075	7.06684	0.347878	0.0610294	0.0601788
REACTOME_PATHWAY	R-HSA-3000170:R-HSA-3000170	6	3.38983	1.85452e-05	COL1A1, VTN, COL3A1, COL1A2, ITGB5, ACTN1	115	27	9075	17.5362	0.00530839	0.00532248	0.0052483
REACTOME_PATHWAY	R-HSA-3000178:R-HSA-3000178	6	3.38983	0.00245721	COL1A1, VTN, COL3A1, COL1A2, ITGB5, LAMB1	115	75	9075	6.31304	0.506429	0.0881525	0.0869239
UP_SEQ_FEATURE	calcium-binding region:1	5	2.82486	0.0245039	MACF1, PPP3R1, RCN2, PDCD6, CHP1	173	128	20063	4.53012	1	0.772567	0.771623
UP_SEQ_FEATURE	calcium-binding region:2	5	2.82486	0.0188119	MACF1, PPP3R1, RCN2, PDCD6, CHP1	173	118	20063	4.91403	1	0.732768	0.731872
UP_SEQ_FEATURE	domain:EF-hand 3	5	2.82486	0.0094038	MYL6, PPP3R1, RCN2, PDCD6, CHP1	173	96	20063	6.04016	0.999556	0.591716	0.590993
UP_SEQ_FEATURE	domain:EGF-like 1	5	2.82486	0.0198767	FBLN1, THBS2, LTBP1, NID2, FBN1	173	120	20063	4.83213	1	0.739052	0.738149
UP_KEYWORDS	Dwarfism	5	2.82486	0.0281559	COL1A1, MMP13, COL1A2, STAT3, FBN1	177	134	20581	4.33869	0.999437	0.235242	0.216387
GOTERM_MF_DIRECT	GO:0003725~double-stranded RNA binding	5	2.82486	0.0036028	IFIH1, TFRC, DDX58, ACTN1, EIF2AK2	175	61	16881	7.90679	0.724322	0.12862	0.126098
GOTERM_BP_DIRECT	GO:0006935~chemotaxis	5	2.82486	0.0361466	CXCL6, CXCL10, CXCL8, RAC2, CXCL1	172	122	16792	4.00114	1	1	0.996549
GOTERM_BP_DIRECT	GO:0030574~collagen catabolic process	5	2.82486	0.00410255	COL1A1, MRC2, COL3A1, MMP13, COL1A2	172	64	16792	7.62718	0.991509	0.425039	0.423207
KEGG_PATHWAY	hsa04621:NOD-like receptor signaling pathway	5	2.82486	0.00779307	MAPK10, CXCL8, IL1B, CXCL1, MAPK3	98	56	6879	6.26731	0.773833	0.148068	0.141834
KEGG_PATHWAY	hsa05131:Shigellosis	5	2.82486	0.0123798	MAPK10, CXCL8, RHOG, ACTB, MAPK3	98	64	6879	5.4839	0.906223	0.196013	0.18776
KEGG_PATHWAY	hsa05133:Pertussis	5	2.82486	0.021073	MAPK10, CXCL6, CXCL8, IL1B, MAPK3	98	75	6879	4.67959	0.982519	0.28599	0.273949
KEGG_PATHWAY	hsa05142:Chagas disease (American trypanosomiasis)	5	2.82486	0.0587686	MAPK10, CXCL8, IL1B, PPP2R2A, MAPK3	98	104	6879	3.37471	0.99999	0.465251	0.445662
REACTOME_PATHWAY	R-HSA-1474228:R-HSA-1474228	5	2.82486	0.0165312	MMP13, BMP1, ADAMTS1, LAMB1, FBN1	115	78	9075	5.05853	0.991638	0.364959	0.359872
REACTOME_PATHWAY	R-HSA-2129379:R-HSA-2129379	5	2.82486	0.00125431	VTN, ITGB5, FBLN1, LTBP1, FBN1	115	38	9075	10.3833	0.302471	0.0610294	0.0601788
REACTOME_PATHWAY	R-HSA-3000480:R-HSA-3000480	5	2.82486	7.9149e-05	COLEC12, COL1A1, COL3A1, COL1A2, APOA1	115	19	9075	20.7666	0.0224606	0.0113579	0.0111996
UP_SEQ_FEATURE	short sequence motif:Effector region	5	2.82486	0.0111852	RAB5B, RAB5C, RAB18, RHOG, RAC2	173	101	20063	5.74114	0.999898	0.64137	0.640586
UP_KEYWORDS	Aminopeptidase	4	2.25989	0.00172089	DNPEP, XPNPEP1, RNPEP, TPP2	177	28	20581	16.611	0.363177	0.026522	0.0243962
UP_SEQ_FEATURE	domain:EF-hand 4	4	2.25989	0.016182	PPP3R1, RCN2, PDCD6, CHP1	173	62	20063	7.48201	0.999998	0.731034	0.73014
UP_SEQ_FEATURE	domain:EGF-like 5; calcium-binding	4	2.25989	0.00419066	FBLN1, LTBP1, NID2, FBN1	173	38	20063	12.2075	0.967644	0.432582	0.432054
GOTERM_MF_DIRECT	GO:0004177~aminopeptidase activity	4	2.25989	0.00262458	DNPEP, XPNPEP1, RNPEP, TPP2	175	27	16881	14.2908	0.608672	0.122108	0.119714
GOTERM_MF_DIRECT	GO:0008009~chemokine activity	4	2.25989	0.0140169	CXCL6, CXCL10, CXCL8, CXCL1	175	49	16881	7.87452	0.993523	0.384926	0.377378
GOTERM_MF_DIRECT	GO:0008237~metallopeptidase activity	4	2.25989	0.0512324	BMP1, DNPEP, ADAMTS1, RNPEP	175	81	16881	4.7636	1	0.831363	0.815061
GOTERM_BP_DIRECT	GO:0030199~collagen fibril organization	4	2.25989	0.00724751	GREM1, COL1A1, COL3A1, COL1A2	172	39	16792	10.0131	0.999783	0.600508	0.59792
GOTERM_CC_DIRECT	GO:0033116~endoplasmic reticulum-Golgi intermediate compartment membrane	4	2.25989	0.0236511	CTSZ, TMED7-TICAM2, CD59, SEC22B	176	64	18224	6.47159	0.998154	0.23038	0.214612
GOTERM_BP_DIRECT	GO:0042157~lipoprotein metabolic process	4	2.25989	0.00673976	BMP1, APOC3, APOA1, APOL2	172	38	16792	10.2766	0.999608	0.600508	0.59792
GOTERM_BP_DIRECT	GO:0060326~cell chemotaxis	4	2.25989	0.0286087	CXCL6, CXCL10, RHOG, CXCL1	172	65	16792	6.00787	1	1	0.996549
GOTERM_BP_DIRECT	GO:0070098~chemokine-mediated signaling pathway	4	2.25989	0.035831	CXCL6, CXCL10, CXCL8, CXCL1	172	71	16792	5.50016	1	1	0.996549
UP_KEYWORDS	Hydroxylation	4	2.25989	0.0480715	COL1A1, COL3A1, COL1A2, LTBP1	177	95	20581	4.89587	0.999998	0.322942	0.297057
UP_KEYWORDS	Osteogenesis imperfecta	4	2.25989	0.000730017	COL1A1, BMP1, COL1A2, PLOD2	177	21	20581	22.148	0.174143	0.0173877	0.015994
REACTOME_PATHWAY	R-HSA-1442490:R-HSA-1442490	4	2.25989	0.0462868	COL1A1, COL3A1, MMP13, COL1A2	115	64	9075	4.93207	0.999999	0.623903	0.615207
REACTOME_PATHWAY	R-HSA-2022090:R-HSA-2022090	4	2.25989	0.0198114	COL1A1, COL3A1, MMP13, COL1A2	115	46	9075	6.862	0.996795	0.406134	0.400473
REACTOME_PATHWAY	R-HSA-2243919:R-HSA-2243919	4	2.25989	0.000296019	COL1A1, BMP1, COL1A2, PCOLCE	115	11	9075	28.6957	0.0814601	0.0283191	0.0279244
REACTOME_PATHWAY	R-HSA-3000171:R-HSA-3000171	4	2.25989	0.013611	COL1A1, COL3A1, COL1A2, LAMB1	115	40	9075	7.8913	0.980419	0.353056	0.348135
REACTOME_PATHWAY	R-HSA-380108:R-HSA-380108	4	2.25989	0.0377616	CXCL6, CXCL10, CXCL8, CXCL1	115	59	9075	5.35004	0.999984	0.558022	0.550245
BBID	109.Chemokine_families	3	1.69492	0.0409741	CXCL6, CXCL10, CXCL8	6	27	388	7.18519	0.487982	0.614612	0.614612
UP_SEQ_FEATURE	calcium-binding region:4	3	1.69492	0.0125451	PPP3R1, RCN2, PDCD6	173	20	20063	17.3957	0.999967	0.64137	0.640586
UP_SEQ_FEATURE	domain:EGF-like 3; calcium-binding	3	1.69492	0.0419947	FBLN1, LTBP1, NID2	173	38	20063	9.15561	1	1	1
UP_SEQ_FEATURE	domain:EGF-like 4; calcium-binding	3	1.69492	0.0342623	FBLN1, LTBP1, FBN1	173	34	20063	10.2327	1	0.904083	0.902978
UP_SEQ_FEATURE	domain:EGF-like 7; calcium-binding	3	1.69492	0.0238682	FBLN1, LTBP1, FBN1	173	28	20063	12.4255	1	0.772567	0.771623
UP_SEQ_FEATURE	domain:EGF-like 8; calcium-binding	3	1.69492	0.0178205	FBLN1, LTBP1, FBN1	173	24	20063	14.4964	1	0.731034	0.73014
UP_SEQ_FEATURE	domain:EGF-like 9; calcium-binding	3	1.69492	0.00810291	FBLN1, LTBP1, FBN1	173	16	20063	21.7446	0.998702	0.552348	0.551673
UP_SEQ_FEATURE	domain:Fibrillar collagen NC1	3	1.69492	0.00381973	COL1A1, COL3A1, COL1A2	173	11	20063	31.6285	0.956138	0.432582	0.432054
UP_KEYWORDS	Ehlers-Danlos syndrome	3	1.69492	0.00618487	COL1A1, COL3A1, COL1A2	177	14	20581	24.9165	0.80318	0.0675181	0.0621064
GOTERM_CC_DIRECT	GO:0005868~cytoplasmic dynein complex	3	1.69492	0.00886807	DYNC1I2, DCTN4, DYNLL1	176	15	18224	20.7091	0.903933	0.122753	0.114351
GOTERM_BP_DIRECT	GO:0032480~negative regulation of type I interferon production	3	1.69492	0.0372203	IFIH1, DDX58, PIN1	172	30	16792	9.76279	1	1	0.996549
GOTERM_MF_DIRECT	GO:0048407~platelet-derived growth factor binding	3	1.69492	0.00546551	COL1A1, COL3A1, COL1A2	175	11	16881	26.3081	0.858653	0.177381	0.173903
GOTERM_MF_DIRECT	GO:0070006~metalloaminopeptidase activity	3	1.69492	0.0231893	DNPEP, XPNPEP1, RNPEP	175	23	16881	12.5821	0.99977	0.591327	0.579732
GOTERM_BP_DIRECT	GO:0090023~positive regulation of neutrophil chemotaxis	3	1.69492	0.0208375	CXCL8, RAC2, CXCL1	172	22	16792	13.3129	1	1	0.996549
BIOCARTA	h_etcPathway:Electron Transport Reaction in Mitochondria	3	1.69492	0.0133368	SDHC, SLC25A4, SLC25A6	28	11	1625	15.8279	0.759062	1	1
KEGG_PATHWAY	hsa03060:Protein export	3	1.69492	0.0410868	SEC61A1, SRPRB, SEC63	98	23	6879	9.15572	0.999655	0.410868	0.393568
UP_SEQ_FEATURE	propeptide:C-terminal propeptide	3	1.69492	0.00197776	COL1A1, COL3A1, COL1A2	173	8	20063	43.4892	0.801593	0.391363	0.390884
UP_SEQ_FEATURE	propeptide:N-terminal propeptide	3	1.69492	0.00107155	COL1A1, COL3A1, COL1A2	173	6	20063	57.9855	0.583525	0.292177	0.29182
REACTOME_PATHWAY	R-HSA-1474244:R-HSA-1474244	3	1.69492	0.0147619	COL1A1, COL3A1, COL1A2	115	15	9075	15.7826	0.985994	0.353056	0.348135
REACTOME_PATHWAY	R-HSA-2214320:R-HSA-2214320	3	1.69492	0.0147619	COL1A1, BMP1, COL1A2	115	15	9075	15.7826	0.985994	0.353056	0.348135
UP_KEYWORDS	Rotamase	3	1.69492	0.0418094	FKBP11, PPIF, PIN1	177	38	20581	9.17975	0.999986	0.290011	0.266765
