# Supplementary material for: Global proteomics reveals pathways of mesenchymal stem cells altered by Mycobacterium tuberculosis.
Source: Research Square preprint supplement (doi:10.21203/rs.3.rs-4179764/v1), 2024-08-29
Supplement: Supplementary file 4 [file d3d97456566aec6da7a32540.xlsx]

## Sheet: Sheet1
Category	Term	Count	%	P value	Genes	List Total	Pop Hits	Pop Total	Fold Enrichment	Bonferroni	Benjamini	FDR
UP_SEQ_FEATURE	signal peptide	32	22.3776	0.0470623	FKBP11, POGLUT1, ITIH2, LTBP1, MRC2, VTN, CNPY4, KDELC2, APOE, TPBG, HLA-B, APOA1, APOC3, EPDR1, PCOLCE, SLC39A14, PLA2G15, COL3A1, MMP14, RCN2, BMP1, COL5A1, PTK7, COL5A2, ITGA11, PIGK, FKBP7, CD47, MFGE8, PLBD2, LGMN, FBN1	139	3346	20063	1.3804	1	1	1
UP_KEYWORDS	Nucleotide-binding	21	14.6853	0.0198526	NEK9, ACAA2, CSNK2A1, DDX58, ROCK2, RRAD, ARL1, EIF2AK2, UBE2L6, ACTB, ASS1, CCT6B, IFIH1, AFG3L2, CDK4, PMVK, RAC2, GBP2, ABCE1, GART, GALK1	142	1788	20581	1.70228	0.992648	0.197025	0.181746
UP_KEYWORDS	Mitochondrion	19	13.2867	0.000647413	NDUFA8, ACAA2, NDUFA4, MRPS23, PYCR1, CPOX, PYCR2, UQCRH, BCL2L13, AFG3L2, CHCHD3, NNT, NDUFS6, OXCT1, NDUFS4, PPIF, CHCHD2P9, ABCE1, SLC25A11	142	1119	20581	2.46094	0.14672	0.0226595	0.0209022
UP_KEYWORDS	ATP-binding	17	11.8881	0.0288063	NEK9, ACAA2, CSNK2A1, DDX58, ROCK2, EIF2AK2, UBE2L6, ACTB, ASS1, CCT6B, IFIH1, AFG3L2, CDK4, PMVK, ABCE1, GART, GALK1	142	1391	20581	1.77133	0.999224	0.227663	0.210007
GOTERM_CC_DIRECT	GO:0005743~mitochondrial inner membrane	14	9.79021	3.35527e-05	NDUFA8, ACAA2, CNP, NDUFA4, MRPS23, CPOX, UQCRH, AFG3L2, CHCHD3, NNT, NDUFS6, NDUFS4, PPIF, SLC25A11	140	441	18224	4.13243	0.00732123	0.00146961	0.00137566
GOTERM_CC_DIRECT	GO:0031012~extracellular matrix	11	7.69231	9.24895e-05	VTN, COL3A1, MMP14, MYL6, COL5A1, COL5A2, PCOLCE, APOE, MFGE8, LTBP1, FBN1	140	296	18224	4.83745	0.0200524	0.00337587	0.00316006
GOTERM_CC_DIRECT	GO:0031012~extracellular matrix	11	7.69231	9.24895e-05	VTN, COL3A1, MMP14, MYL6, COL5A1, COL5A2, PCOLCE, APOE, MFGE8, LTBP1, FBN1	140	296	18224	4.83745	0.0200524	0.00337587	0.00316006
GOTERM_BP_DIRECT	GO:0045087~innate immune response	11	7.69231	0.00264096	IFIH1, COLEC12, IFI16, DDX58, TOLLIP, HLA-B, EIF2AK2, IL36G, CORO1A, PML, NFKB2	137	430	16792	3.13549	0.941117	0.314274	0.31222
UP_KEYWORDS	Immunity	10	6.99301	0.0076174	IFIH1, IFITM1, IFI16, DDX58, TOLLIP, HLA-B, EIF2AK2, IL36G, PML, IFIT2	142	500	20581	2.89873	0.846401	0.0982244	0.090607
UP_KEYWORDS	Transit peptide	10	6.99301	0.0116598	ACAA2, NDUFS6, NNT, OXCT1, NDUFS4, AGPS, PPIF, CPOX, CHCHD2P9, UQCRH	142	536	20581	2.70404	0.943496	0.142833	0.131756
UP_KEYWORDS	Innate immunity	9	6.29371	0.000445652	IFIH1, IFITM1, IFI16, DDX58, TOLLIP, EIF2AK2, IL36G, PML, IFIT2	142	261	20581	4.99781	0.103457	0.0181975	0.0167862
KEGG_PATHWAY	hsa05168:Herpes simplex infection	9	6.29371	0.000792122	IFIH1, CSNK2A1, DDX58, IL1B, STAT2, ALYREF, HLA-B, EIF2AK2, PML	76	183	6879	4.45147	0.119779	0.127532	0.123571
GOTERM_BP_DIRECT	GO:0030198~extracellular matrix organization	8	5.59441	0.00108963	VTN, COL3A1, COL5A1, ITGA11, COL5A2, CD47, NFKB2, FBN1	137	196	16792	5.00283	0.688898	0.275051	0.273253
UP_KEYWORDS	Mitochondrion inner membrane	8	5.59441	0.00263178	NDUFA8, CHCHD3, NDUFS6, NDUFA4, NNT, NDUFS4, SLC25A11, UQCRH	142	270	20581	4.29442	0.475671	0.0429857	0.0396521
KEGG_PATHWAY	hsa04510:Focal adhesion	8	5.59441	0.00690791	VTN, COL3A1, COL5A1, ROCK2, ITGA11, COL5A2, RAC2, ACTB	76	206	6879	3.51507	0.672423	0.185362	0.179606
KEGG_PATHWAY	hsa04510:Focal adhesion	8	5.59441	0.00690791	VTN, COL3A1, COL5A1, ROCK2, ITGA11, COL5A2, RAC2, ACTB	76	206	6879	3.51507	0.672423	0.185362	0.179606
UP_SEQ_FEATURE	transit peptide:Mitochondrion	8	5.59441	0.0491975	CHCHD3, NDUFS6, NNT, OXCT1, NDUFS4, PPIF, CPOX, UQCRH	139	482	20063	2.39565	1	1	1
UP_KEYWORDS	Antiviral defense	7	4.8951	0.000148636	IFIH1, IFITM1, DDX58, STAT2, EIF2AK2, PML, IFIT2	142	116	20581	8.74618	0.0357634	0.00728316	0.00671835
UP_KEYWORDS	Antiviral defense	7	4.8951	0.000148636	IFIH1, IFITM1, DDX58, STAT2, EIF2AK2, PML, IFIT2	142	116	20581	8.74618	0.0357634	0.00728316	0.00671835
GOTERM_MF_DIRECT	GO:0005178~integrin binding	7	4.8951	0.000221919	VTN, COL3A1, MMP14, COL5A1, CD9, MFGE8, FBN1	139	105	16881	8.0964	0.0644148	0.0332878	0.0331769
REACTOME_PATHWAY	R-HSA-216083:R-HSA-216083	7	4.8951	0.000253971	VTN, COL3A1, COL5A1, ITGA11, COL5A2, CD47, FBN1	95	86	9075	7.7754	0.0593787	0.0612069	0.059937
KEGG_PATHWAY	hsa05162:Measles	7	4.8951	0.0031526	IFIH1, CSNK2A1, DDX58, CDK4, IL1B, STAT2, EIF2AK2	76	133	6879	4.76385	0.398525	0.16919	0.163935
KEGG_PATHWAY	hsa05012:Parkinson's disease	7	4.8951	0.00435571	NDUFA8, NDUFS6, NDUFA4, NDUFS4, PPIF, UBE2L6, UQCRH	76	142	6879	4.46192	0.504804	0.175317	0.169873
KEGG_PATHWAY	hsa05010:Alzheimer's disease	7	4.8951	0.00972997	NDUFA8, NDUFS6, NDUFA4, IL1B, NDUFS4, APOE, UQCRH	76	168	6879	3.77138	0.792826	0.223789	0.216839
KEGG_PATHWAY	hsa05164:Influenza A	7	4.8951	0.011448	IFIH1, DDX58, IL1B, STAT2, EIF2AK2, PML, ACTB	76	174	6879	3.64133	0.843352	0.23039	0.223236
KEGG_PATHWAY	hsa05016:Huntington's disease	7	4.8951	0.0178798	NDUFA8, NDUFS6, NDUFA4, DCTN4, NDUFS4, PPIF, UQCRH	76	192	6879	3.29996	0.945235	0.287865	0.278925
UP_KEYWORDS	Electron transport	6	4.1958	0.000890206	CYB5A, NDUFA8, NDUFS6, NDUFA4, NDUFS4, UQCRH	142	108	20581	8.05203	0.196033	0.0227941	0.0210264
KEGG_PATHWAY	hsa04512:ECM-receptor interaction	6	4.1958	0.00248311	VTN, COL3A1, COL5A1, ITGA11, COL5A2, CD47	76	87	6879	6.24229	0.329867	0.16919	0.163935
GOTERM_BP_DIRECT	GO:0051607~defense response to virus	6	4.1958	0.0110655	IFITM1, IFI16, STAT2, EIF2AK2, PML, IFIT2	137	165	16792	4.45707	0.999993	0.592556	0.588683
GOTERM_BP_DIRECT	GO:0051607~defense response to virus	6	4.1958	0.0110655	IFITM1, IFI16, STAT2, EIF2AK2, PML, IFIT2	137	165	16792	4.45707	0.999993	0.592556	0.588683
GOTERM_BP_DIRECT	GO:0051607~defense response to virus	6	4.1958	0.0110655	IFITM1, IFI16, STAT2, EIF2AK2, PML, IFIT2	137	165	16792	4.45707	0.999993	0.592556	0.588683
KEGG_PATHWAY	hsa00190:Oxidative phosphorylation	6	4.1958	0.0146851	NDUFA8, NDUFS6, NDUFA4, NDUFS4, UQCRH, ATP6V0A1	76	133	6879	4.0833	0.907618	0.262699	0.254541
GOTERM_BP_DIRECT	GO:0006457~protein folding	6	4.1958	0.0156241	FKBP11, CSNK2A1, PPIF, PFDN1, FKBP7, CCT6B	137	180	16792	4.08564	1	0.661498	0.657174
KEGG_PATHWAY	hsa04932:Non-alcoholic fatty liver disease (NAFLD)	6	4.1958	0.0240617	NDUFA8, NDUFS6, NDUFA4, IL1B, NDUFS4, UQCRH	76	151	6879	3.59655	0.980185	0.322828	0.312802
GOTERM_BP_DIRECT	GO:0042157~lipoprotein metabolic process	5	3.4965	0.000245404	BMP1, APOC3, APOA1, APOE, APOL2	137	38	16792	16.1275	0.231151	0.262828	0.26111
GOTERM_MF_DIRECT	GO:0008137~NADH dehydrogenase (ubiquinone) activity	5	3.4965	0.000629439	C15ORF48, NDUFA8, NDUFS6, NDUFA4, NDUFS4	139	48	16881	12.6506	0.172123	0.0629439	0.0627341
UP_KEYWORDS	Respiratory chain	5	3.4965	0.0009192	NDUFA8, NDUFS6, NDUFA4, NDUFS4, UQCRH	142	63	20581	11.5029	0.201729	0.0227941	0.0210264
GOTERM_BP_DIRECT	GO:0030574~collagen catabolic process	5	3.4965	0.00179582	MRC2, COL3A1, MMP14, COL5A1, COL5A2	137	64	16792	9.57573	0.854131	0.275051	0.273253
GOTERM_BP_DIRECT	GO:0060337~type I interferon signaling pathway	5	3.4965	0.00179582	IFITM1, STAT2, HLA-B, GBP2, IFIT2	137	64	16792	9.57573	0.854131	0.275051	0.273253
UP_KEYWORDS	Collagen	5	3.4965	0.00463675	COLEC12, COL3A1, COL5A1, COL5A2, PCOLCE	142	98	20581	7.39473	0.679747	0.0631113	0.0582169
REACTOME_PATHWAY	R-HSA-1650814:R-HSA-1650814	5	3.4965	0.00502972	COL3A1, BMP1, COL5A1, COL5A2, PCOLCE	95	67	9075	7.12883	0.703356	0.153783	0.150592
REACTOME_PATHWAY	R-HSA-909733:R-HSA-909733	5	3.4965	0.00502972	IFITM1, STAT2, HLA-B, GBP2, IFIT2	95	67	9075	7.12883	0.703356	0.153783	0.150592
GOTERM_CC_DIRECT	GO:0005581~collagen trimer	5	3.4965	0.00539358	COLEC12, COL3A1, COL5A1, COL5A2, PCOLCE	140	92	18224	7.07453	0.694068	0.109191	0.10221
REACTOME_PATHWAY	R-HSA-611105:R-HSA-611105	5	3.4965	0.0115431	NDUFA8, NDUFS6, NDUFA4, NDUFS4, UQCRH	95	85	9075	5.6192	0.939073	0.278189	0.272418
GOTERM_BP_DIRECT	GO:0006979~response to oxidative stress	5	3.4965	0.0122747	MMP14, GPX1, GPX8, HMOX1, APOE	137	110	16792	5.57133	0.999998	0.597553	0.593647
GOTERM_BP_DIRECT	GO:0009615~response to virus	5	3.4965	0.0122747	IFIH1, IFITM1, DDX58, EIF2AK2, IFIT2	137	110	16792	5.57133	0.999998	0.597553	0.593647
GOTERM_BP_DIRECT	GO:0009615~response to virus	5	3.4965	0.0122747	IFIH1, IFITM1, DDX58, EIF2AK2, IFIT2	137	110	16792	5.57133	0.999998	0.597553	0.593647
GOTERM_MF_DIRECT	GO:0008289~lipid binding	5	3.4965	0.0353623	PITPNB, APOC3, APOA1, APOE, APOL2	139	151	16881	4.02139	0.99998	0.628406	0.626311
UP_SEQ_FEATURE	domain:EF-hand 1	5	3.4965	0.0390607	MYL6, RCN2, PDCD6, FKBP7, S100A4	139	185	20063	3.90103	1	1	1
UP_SEQ_FEATURE	domain:EF-hand 2	5	3.4965	0.0390607	MYL6, RCN2, PDCD6, FKBP7, S100A4	139	185	20063	3.90103	1	1	1
GOTERM_MF_DIRECT	GO:0008201~heparin binding	5	3.4965	0.0423877	VTN, COL5A1, PCOLCE, APOE, FBN1	139	160	16881	3.79519	0.999998	0.628406	0.626311
KEGG_PATHWAY	hsa04611:Platelet activation	5	3.4965	0.0529698	COL3A1, COL5A1, ROCK2, COL5A2, ACTB	76	130	6879	3.48128	0.999843	0.609152	0.590234
REACTOME_PATHWAY	R-HSA-194223:R-HSA-194223	4	2.7972	0.0010798	BMP1, APOC3, APOA1, APOE	95	20	9075	19.1053	0.229235	0.0650579	0.0637081
UP_KEYWORDS	Ubiquinone	4	2.7972	0.00175465	NDUFA8, NDUFS6, NDUFA4, NDUFS4	142	35	20581	16.5642	0.349664	0.035824	0.0330458
GOTERM_BP_DIRECT	GO:0032480~negative regulation of type I interferon production	4	2.7972	0.00179772	IFIH1, DDX58, PIN1, UBE2L6	137	30	16792	16.3426	0.854429	0.275051	0.273253
UP_KEYWORDS	Rotamase	4	2.7972	0.00222799	FKBP11, PPIF, PIN1, FKBP7	142	38	20581	15.2565	0.421008	0.0389898	0.0359661
REACTOME_PATHWAY	R-HSA-3000170:R-HSA-3000170	4	2.7972	0.00262908	VTN, COL3A1, COL5A1, COL5A2	95	27	9075	14.152	0.469769	0.126722	0.124093
GOTERM_BP_DIRECT	GO:0000413~protein peptidyl-prolyl isomerization	4	2.7972	0.00506179	FKBP11, PPIF, PIN1, FKBP7	137	43	16792	11.4018	0.995639	0.451765	0.448812
REACTOME_PATHWAY	R-HSA-936440:R-HSA-936440	4	2.7972	0.00510482	IFIH1, DDX58, PIN1, UBE2L6	95	34	9075	11.2384	0.708703	0.153783	0.150592
GOTERM_CC_DIRECT	GO:0005747~mitochondrial respiratory chain complex I	4	2.7972	0.00619228	NDUFA8, NDUFS6, NDUFA4, NDUFS4	140	49	18224	10.6262	0.743423	0.109191	0.10221
GOTERM_MF_DIRECT	GO:0003755~peptidyl-prolyl cis-trans isomerase activity	4	2.7972	0.00627752	FKBP11, PPIF, PIN1, FKBP7	139	46	16881	10.5605	0.848806	0.470814	0.469245
GOTERM_BP_DIRECT	GO:0006120~mitochondrial electron transport, NADH to ubiquinone	4	2.7972	0.00729542	NDUFA8, NDUFS6, NDUFA4, NDUFS4	137	49	16792	10.0057	0.999607	0.488337	0.485146
GOTERM_MF_DIRECT	GO:0005201~extracellular matrix structural constituent	4	2.7972	0.0175027	COL3A1, COL5A1, COL5A2, FBN1	139	67	16881	7.25051	0.994995	0.628406	0.626311
UP_KEYWORDS	Heparin-binding	4	2.7972	0.0226292	VTN, COL5A1, APOE, FBN1	142	88	20581	6.58803	0.996331	0.213237	0.1967
GOTERM_BP_DIRECT	GO:0006869~lipid transport	4	2.7972	0.0237833	APOC3, APOA1, APOE, APOL2	137	76	16792	6.45102	1	0.735333	0.730527
UP_KEYWORDS	Hydroxylation	4	2.7972	0.0275806	COL3A1, COL5A1, COL5A2, LTBP1	142	95	20581	6.10259	0.998943	0.227663	0.210007
UP_KEYWORDS	Lipid transport	4	2.7972	0.0283313	APOC3, APOA1, APOE, APOL2	142	96	20581	6.03903	0.999125	0.227663	0.210007
REACTOME_PATHWAY	R-HSA-1442490:R-HSA-1442490	4	2.7972	0.0284674	COL3A1, MMP14, COL5A1, COL5A2	95	64	9075	5.97039	0.999051	0.457376	0.447887
GOTERM_MF_DIRECT	GO:0005543~phospholipid binding	4	2.7972	0.0334576	PLA2G15, APOC3, APOA1, APOE	139	86	16881	5.64865	0.999963	0.628406	0.626311
GOTERM_BP_DIRECT	GO:0007160~cell-matrix adhesion	4	2.7972	0.036655	VTN, COL3A1, ITGA11, EPDR1	137	90	16792	5.44753	1	0.889142	0.88333
REACTOME_PATHWAY	R-HSA-3000178:R-HSA-3000178	4	2.7972	0.0425653	VTN, COL3A1, COL5A1, COL5A2	95	75	9075	5.09474	0.999972	0.576532	0.56457
GOTERM_BP_DIRECT	GO:0007229~integrin-mediated signaling pathway	4	2.7972	0.0464692	COL3A1, ITGA11, APOA1, CD47	137	99	16792	4.9523	1	0.944625	0.938451
UP_KEYWORDS	Isomerase	4	2.7972	0.0515787	FKBP11, PPIF, PIN1, FKBP7	142	122	20581	4.75202	0.999998	0.37167	0.342847
GOTERM_BP_DIRECT	GO:0032489~regulation of Cdc42 protein signal transduction	3	2.0979	0.000640837	APOC3, APOA1, APOE	137	5	16792	73.5416	0.496694	0.275051	0.273253
UP_SEQ_FEATURE	propeptide:C-terminal propeptide	3	2.0979	0.00127997	COL3A1, COL5A1, COL5A2	139	8	20063	54.1268	0.549741	0.77389	0.77389
UP_SEQ_FEATURE	domain:Fibrillar collagen NC1	3	2.0979	0.00248042	COL3A1, COL5A1, COL5A2	139	11	20063	39.3649	0.787161	0.77389	0.77389
UP_KEYWORDS	Ehlers-Danlos syndrome	3	2.0979	0.00401814	COL3A1, COL5A1, COL5A2	142	14	20581	31.0578	0.627094	0.0579085	0.0534176
GOTERM_CC_DIRECT	GO:0042627~chylomicron	3	2.0979	0.0049496	APOC3, APOA1, APOE	140	14	18224	27.8939	0.662656	0.109191	0.10221
GOTERM_BP_DIRECT	GO:0033700~phospholipid efflux	3	2.0979	0.00555941	APOC3, APOA1, APOE	137	14	16792	26.2649	0.997448	0.455591	0.452613
GOTERM_BP_DIRECT	GO:0033627~cell adhesion mediated by integrin	3	2.0979	0.00638083	VTN, ITGA11, FBN1	137	15	16792	24.5139	0.998947	0.455591	0.452613
GOTERM_BP_DIRECT	GO:0034375~high-density lipoprotein particle remodeling	3	2.0979	0.00638083	APOC3, APOA1, APOE	137	15	16792	24.5139	0.998947	0.455591	0.452613
GOTERM_BP_DIRECT	GO:0043691~reverse cholesterol transport	3	2.0979	0.00915145	APOC3, APOA1, APOE	137	18	16792	20.4282	0.999947	0.515853	0.512481
GOTERM_CC_DIRECT	GO:0034361~very-low-density lipoprotein particle	3	2.0979	0.01003	APOC3, APOA1, APOE	140	20	18224	19.5257	0.890043	0.130957	0.122586
REACTOME_PATHWAY	R-HSA-1474244:R-HSA-1474244	3	2.0979	0.0102103	COL3A1, COL5A1, COL5A2	95	15	9075	19.1053	0.915696	0.273409	0.267736
REACTOME_PATHWAY	R-HSA-168928:R-HSA-168928	3	2.0979	0.0130484	IFIH1, DDX58, UBE2L6	95	17	9075	16.8576	0.957801	0.285879	0.279948
UP_KEYWORDS	Amino-acid biosynthesis	3	2.0979	0.0136009	PYCR1, PYCR2, ASS1	142	26	20581	16.7235	0.965094	0.158677	0.146371
GOTERM_BP_DIRECT	GO:0019433~triglyceride catabolic process	3	2.0979	0.0172941	APOC3, APOA1, APOE	137	25	16792	14.7083	1	0.661498	0.657174
GOTERM_BP_DIRECT	GO:0033344~cholesterol efflux	3	2.0979	0.0172941	APOC3, APOA1, APOE	137	25	16792	14.7083	1	0.661498	0.657174
GOTERM_BP_DIRECT	GO:0070328~triglyceride homeostasis	3	2.0979	0.018637	APOC3, APOA1, APOE	137	26	16792	14.1426	1	0.688283	0.683785
REACTOME_PATHWAY	R-HSA-174800:R-HSA-174800	3	2.0979	0.0252696	APOC3, APOA1, APOE	95	24	9075	11.9408	0.997905	0.457376	0.447887
GOTERM_BP_DIRECT	GO:0043588~skin development	3	2.0979	0.0308493	COL3A1, COL5A1, COL5A2	137	34	16792	10.8149	1	0.853576	0.847997
GOTERM_BP_DIRECT	GO:0000302~response to reactive oxygen species	3	2.0979	0.0396979	GPX1, GPX8, APOE	137	39	16792	9.42841	1	0.889142	0.88333
GOTERM_BP_DIRECT	GO:0030199~collagen fibril organization	3	2.0979	0.0396979	COL3A1, COL5A1, COL5A2	137	39	16792	9.42841	1	0.889142	0.88333
REACTOME_PATHWAY	R-HSA-186797:R-HSA-186797	3	2.0979	0.0430605	COL3A1, COL5A1, COL5A2	95	32	9075	8.95559	0.999975	0.576532	0.56457
GOTERM_MF_DIRECT	GO:0015485~cholesterol binding	3	2.0979	0.0442111	APOC3, APOA1, APOE	139	41	16881	8.8863	0.999999	0.628406	0.626311
UP_KEYWORDS	Cholesterol metabolism	3	2.0979	0.0582425	PMVK, APOA1, APOE	142	57	20581	7.62824	1	0.396373	0.365634
