# Supplementary material for: Global proteomics reveals pathways of mesenchymal stem cells altered by Mycobacterium tuberculosis.
Source: Research Square preprint supplement (doi:10.21203/rs.3.rs-4179764/v1), 2024-08-29
Supplement: Supplementary file 5 [file f4e3000b8d09fecd3d0db71e.xlsx]

## Sheet: Ra_Vs_UI
ID	logFC	AveExpr	t	P.Value	adj.P.Val	B
DDX58	5.833	4.25	2368	3.603e-14	3.603e-14	20.51
ITIH2	5.781	4.225	2347	3.741e-14	3.741e-14	20.51
IFIH1	5.781	4.225	2347	3.741e-14	3.741e-14	20.51
IL36G	5.728	4.198	2326	3.892e-14	3.892e-14	20.5
IL1B	5.615	4.141	2280	4.236e-14	4.236e-14	20.49
MFGE8	5.615	4.141	2280	4.236e-14	4.236e-14	20.49
BMP1	5.555	4.111	2255	4.435e-14	4.435e-14	20.48
NFKB2	5.555	4.111	2255	4.435e-14	4.435e-14	20.48
PYCR1	5.285	3.977	2140	5.54e-14	5.54e-14	20.44
APOL2	5.209	3.939	2102	5.976e-14	5.976e-14	20.42
PPIF	5.209	3.939	2102	5.976e-14	5.976e-14	20.42
CSTB	5.129	3.899	2062	6.495e-14	6.495e-14	20.39
Apoc3	5.044	3.856	2017	7.135e-14	7.135e-14	20.35
C15ORF48	5.044	3.856	2017	7.135e-14	7.135e-14	20.35
CNP	4.858	3.763	1915	8.887e-14	8.887e-14	20.27
ifitm1	4.858	3.763	1915	8.887e-14	8.887e-14	20.27
IFI16	4.858	3.763	1915	8.887e-14	8.887e-14	20.27
IFIT2	4.858	3.763	1915	8.887e-14	8.887e-14	20.27
OCIAD1	4.755	3.711	1858	1.01e-13	1.01e-13	20.21
Uqcrh	4.755	3.711	1858	1.01e-13	1.01e-13	20.21
HMOX1	4.644	3.656	1796	1.166e-13	1.166e-13	20.15
FXR2	4.644	3.656	1796	1.166e-13	1.166e-13	20.15
ATP1B3	4.644	3.656	1796	1.166e-13	1.166e-13	20.15
RRAD	4.644	3.656	1796	1.166e-13	1.166e-13	20.15
GBP2	4.644	3.656	1796	1.166e-13	1.166e-13	20.15
TNS1	4.524	3.596	1727	1.379e-13	1.379e-13	20.07
B3KQQ9	4.392	3.53	1647	1.685e-13	1.685e-13	19.97
TOM1	4.392	3.53	1647	1.685e-13	1.685e-13	19.97
STAT2	4.392	3.53	1647	1.685e-13	1.685e-13	19.97
CD9	4.248	3.458	1551	2.18e-13	2.18e-13	19.82
CD47	4.248	3.458	1551	2.18e-13	2.18e-13	19.82
USP41	4.248	3.458	1551	2.18e-13	2.18e-13	19.82
FNBP3	4.248	3.458	1551	2.18e-13	2.18e-13	19.82
PYCR2	4.087	3.378	1413	3.231e-13	3.231e-13	19.56
A8K2S1	4.087	3.378	1413	3.231e-13	3.231e-13	19.56
B2R6Q5	4.087	3.378	1413	3.231e-13	3.231e-13	19.56
MRPS23	4.087	3.378	1413	3.231e-13	3.231e-13	19.56
APOA1	4.087	3.378	1413	3.231e-13	3.231e-13	19.56
NDUFA8	4.087	3.378	1413	3.231e-13	3.231e-13	19.56
SLC25A11	4.087	3.378	1413	3.231e-13	3.231e-13	19.56
SLC39A14	4.087	3.378	1413	3.231e-13	3.231e-13	19.56
Memo1	3.907	3.287	1223	5.972e-13	5.972e-13	19.09
eif2ak2	3.907	3.287	1223	5.972e-13	5.972e-13	19.09
Q59GW5	3.907	3.287	1223	5.972e-13	5.972e-13	19.09
pmvk	3.907	3.287	1223	5.972e-13	5.972e-13	19.09
Q71V07	3.889	5.223	2.915	0.04036	0.04036	-7.62
EDF1	3.854	5.188	2.915	0.04036	0.04036	-7.621
VTN	3.854	5.188	2.915	0.04036	0.04036	-7.621
IKBIP	3.819	5.153	2.915	0.04036	0.04036	-7.623
HNRNPH3	3.782	5.116	2.915	0.04036	0.04036	-7.624
B7ZB41	3.743	5.077	2.915	0.04036	0.04036	-7.626
PML	3.743	5.077	2.915	0.04036	0.04036	-7.626
GART	3.703	5.037	2.915	0.04036	0.04036	-7.628
PDCD6	3.703	5.037	2.915	0.04036	0.04036	-7.628
A0A1U9X8D3	3.703	5.037	2.915	0.04036	0.04036	-7.628
PCOLCE	3.703	5.037	2.915	0.04036	0.04036	-7.628
NDUFS4	3.7	3.184	1014	1.326e-12	1.326e-12	18.46
NDUFS6	3.7	3.184	1014	1.326e-12	1.326e-12	18.46
TPBG	3.7	3.184	1014	1.326e-12	1.326e-12	18.46
CHCHD3	3.572	4.906	2.913	0.04047	0.04047	-7.635
HLA-B	3.572	4.906	2.913	0.04047	0.04047	-7.635
TOLLIP	3.524	4.858	2.908	0.04065	0.04065	-7.641
CHCHD2P9	3.524	4.858	2.908	0.04065	0.04065	-7.641
PITPNB	3.473	4.807	2.9	0.04103	0.04103	-7.651
B4DPH4	3.459	3.064	909.3	2.106e-12	2.106e-12	18.2
APOE	3.459	3.064	909.3	2.106e-12	2.106e-12	18.2
IFRD1	3.459	3.064	909.3	2.106e-12	2.106e-12	18.2
CDK4	3.459	3.064	909.3	2.106e-12	2.106e-12	18.2
Q5D1D5	3.459	3.064	909.3	2.106e-12	2.106e-12	18.2
DCTN4	3.42	4.753	2.889	0.0415	0.0415	-7.663
A0A590UK80	3.42	4.753	2.889	0.0415	0.0415	-7.663
B4DT57	3.42	4.753	2.889	0.0415	0.0415	-7.663
LYPLA1	3.363	4.697	2.874	0.04213	0.04213	-7.677
ACAA2	3.363	4.697	2.874	0.04213	0.04213	-7.677
MMP14	3.303	4.637	2.857	0.04291	0.04291	-7.695
ASS1	3.303	4.637	2.857	0.04291	0.04291	-7.695
GPX1	3.17	4.504	2.814	0.04491	0.04491	-7.738
GALK1	3.17	4.504	2.814	0.04491	0.04491	-7.738
A8K4K9	3.17	4.504	2.814	0.04491	0.04491	-7.738
B4DH39	3.17	4.504	2.814	0.04491	0.04491	-7.738
OXCT1	3.096	4.43	2.786	0.04625	0.04625	-7.765
NEDD4	3.096	4.43	2.786	0.04625	0.04625	-7.765
PLBD2	3.096	4.43	2.786	0.04625	0.04625	-7.765
Q53GD7	3.016	4.35	2.751	0.04802	0.04802	-7.798
bola2	3.016	4.35	2.751	0.04802	0.04802	-7.798
PSMD10	2.807	2.738	749.4	4.791e-12	4.791e-12	17.94
BCL2L13	2.807	2.738	749.4	4.791e-12	4.791e-12	17.94
UBE2L6	2.807	2.738	749.4	4.791e-12	4.791e-12	17.94
DPM1	2.807	2.738	749.4	4.791e-12	4.791e-12	17.94
AGPS	2.322	2.495	633	9.818e-12	9.818e-12	17.65
ADD1	2.322	2.495	633	9.818e-12	9.818e-12	17.65
RCN2	2.322	2.495	633	9.818e-12	9.818e-12	17.65
LARP1	2.322	2.495	633	9.818e-12	9.818e-12	17.65
KDELC2	2.322	2.495	633	9.818e-12	9.818e-12	17.65
LARP4B	2.322	2.495	633	9.818e-12	9.818e-12	17.65
B2RAK1	-2.322	2.495	-633	9.818e-12	9.818e-12	17.65
IREB2	-2.322	2.495	-633	9.818e-12	9.818e-12	17.65
MCRIP1	-2.322	2.495	-633	9.818e-12	9.818e-12	17.65
CKAP5	-2.322	2.495	-633	9.818e-12	9.818e-12	17.65
B4DVS3	-2.807	2.738	-749.4	4.791e-12	4.791e-12	17.94
ITGA11	-2.807	2.738	-749.4	4.791e-12	4.791e-12	17.94
Mprip-Ntrk1	-2.807	2.738	-749.4	4.791e-12	4.791e-12	17.94
OSTC	-3.016	4.35	-2.751	0.04802	0.04802	-7.798
A0A1U9X9A5	-3.016	4.35	-2.751	0.04802	0.04802	-7.798
LGMN	-3.016	4.35	-2.751	0.04802	0.04802	-7.798
CNBP	-3.016	4.35	-2.751	0.04802	0.04802	-7.798
LTBP1	-3.016	4.35	-2.751	0.04802	0.04802	-7.798
AFG3L2	-3.016	4.35	-2.751	0.04802	0.04802	-7.798
ROCK2	-3.096	4.43	-2.786	0.04625	0.04625	-7.765
RELCH	-3.096	4.43	-2.786	0.04625	0.04625	-7.765
E5RGS7	-3.096	4.43	-2.786	0.04625	0.04625	-7.765
ATP6V0A1	-3.096	4.43	-2.786	0.04625	0.04625	-7.765
B4DZ55	-3.17	2.919	-835.9	3.012e-12	3.012e-12	18.09
E5KN59	-3.17	2.919	-835.9	3.012e-12	3.012e-12	18.09
PSMB7	-3.17	2.919	-835.9	3.012e-12	3.012e-12	18.09
PIGK	-3.17	2.919	-835.9	3.012e-12	3.012e-12	18.09
EPDR1	-3.17	2.919	-835.9	3.012e-12	3.012e-12	18.09
EIF3J	-3.17	4.504	-2.814	0.04491	0.04491	-7.738
EIF3G	-3.17	4.504	-2.814	0.04491	0.04491	-7.738
CPOX	-3.17	4.504	-2.814	0.04491	0.04491	-7.738
COL5A2	-3.239	4.573	-2.837	0.04383	0.04383	-7.715
ABCE1	-3.239	4.573	-2.837	0.04383	0.04383	-7.715
LSM3	-3.303	4.637	-2.857	0.04291	0.04291	-7.695
SEC22B	-3.363	4.697	-2.874	0.04213	0.04213	-7.677
B3KTD5	-3.459	3.064	-909.3	2.106e-12	2.106e-12	18.2
FKBP11	-3.459	3.064	-909.3	2.106e-12	2.106e-12	18.2
Q53FX5	-3.459	3.064	-909.3	2.106e-12	2.106e-12	18.2
CCT6B	-3.572	4.906	-2.913	0.04047	0.04047	-7.635
coro1a	-3.618	4.951	-2.915	0.04039	0.04039	-7.632
C15orf38-AP3S2	-3.7	3.184	-1014	1.326e-12	1.326e-12	18.46
DDB1	-3.703	5.037	-2.915	0.04036	0.04036	-7.628
A0A384NPH9	-3.743	5.077	-2.915	0.04036	0.04036	-7.626
CSNK2A1	-3.743	5.077	-2.915	0.04036	0.04036	-7.626
KRT18	-3.782	5.116	-2.915	0.04036	0.04036	-7.624
CNPY4	-3.854	5.188	-2.915	0.04036	0.04036	-7.621
CEPT1	-3.907	3.287	-1223	5.972e-13	5.972e-13	19.09
ARL1	-3.907	3.287	-1223	5.972e-13	5.972e-13	19.09
POGLUT1	-3.907	3.287	-1223	5.972e-13	5.972e-13	19.09
c11orf68	-3.907	3.287	-1223	5.972e-13	5.972e-13	19.09
STXBP1	-3.922	5.256	-2.915	0.04036	0.04036	-7.619
NEK9	-4.087	3.378	-1413	3.231e-13	3.231e-13	19.56
NDUFA4	-4.087	3.378	-1413	3.231e-13	3.231e-13	19.56
PTK7	-4.087	3.378	-1413	3.231e-13	3.231e-13	19.56
COL3A1	-4.203	5.536	-2.775	0.0468	0.0468	-7.777
STT3B	-4.248	3.458	-1551	2.18e-13	2.18e-13	19.82
SEC62	-4.248	3.458	-1551	2.18e-13	2.18e-13	19.82
CSE1L	-4.392	3.53	-1647	1.685e-13	1.685e-13	19.97
PLA2G15	-4.392	3.53	-1647	1.685e-13	1.685e-13	19.97
TPP2	-4.524	3.596	-1727	1.379e-13	1.379e-13	20.07
S100A4	-4.524	3.596	-1727	1.379e-13	1.379e-13	20.07
FKBP7	-4.524	3.596	-1727	1.379e-13	1.379e-13	20.07
GPX8	-4.644	3.656	-1796	1.166e-13	1.166e-13	20.15
PFDN1	-4.644	3.656	-1796	1.166e-13	1.166e-13	20.15
ALYREF	-4.644	3.656	-1796	1.166e-13	1.166e-13	20.15
TMPO	-4.755	3.711	-1858	1.01e-13	1.01e-13	20.21
PIN1	-4.954	3.811	-1968	7.918e-14	7.918e-14	20.31
COLEC12	-4.954	3.811	-1968	7.918e-14	7.918e-14	20.31
FBLIM1	-4.954	3.811	-1968	7.918e-14	7.918e-14	20.31
ARHGDIB	-5.044	3.856	-2017	7.135e-14	7.135e-14	20.35
CYB5A	-5.044	3.856	-2017	7.135e-14	7.135e-14	20.35
SACM1L	-5.209	3.939	-2102	5.976e-14	5.976e-14	20.42
mrc2	-5.209	3.939	-2102	5.976e-14	5.976e-14	20.42
COL5A1	-5.555	4.111	-2255	4.435e-14	4.435e-14	20.48
NNT	-6.304	4.486	-14.71	8.323e-05	8.323e-05	-0.2042
RAC2	-6.629	4.649	-10.94	0.0002851	0.0002851	-1.718
FBN1	-9.212	5.94	-15.2	7.257e-05	7.257e-05	-0.03534
MYL6	-9.377	6.023	-15.47	6.736e-05	6.736e-05	0.05635
ACTB	-12.94	7.802	-21.35	1.742e-05	1.742e-05	1.723
