# Supplementary material for: Global proteomics reveals pathways of mesenchymal stem cells altered by Mycobacterium tuberculosis.
Source: Research Square preprint supplement (doi:10.21203/rs.3.rs-4179764/v1), 2024-08-29
Supplement: Supplementary file 6 [file fadffdf6f78852240f180f2c.xlsx]

## Sheet: Ra_Vs_RV
ID	logFC	AveExpr	t	P.Value	adj.P.Val	B
C0IMJ3	8.889	5.802	55.53	5.686e-08	5.686e-08	6.306
NACAP1	7.033	4.874	43.93	1.761e-07	1.761e-07	6.063
CXCL10	6.211	4.463	38.8	3.207e-07	3.207e-07	5.893
RPL22L1	6.088	4.401	38.03	3.533e-07	3.533e-07	5.862
CTGF	6.044	4.379	37.76	3.658e-07	3.658e-07	5.851
COL5A1	5.576	4.145	34.83	5.395e-07	5.395e-07	5.718
THBS2	5.307	4.011	33.12	6.883e-07	6.883e-07	5.623
CXCL1	5.231	3.973	32.58	7.448e-07	7.448e-07	5.586
okuribin	5.066	3.89	31.17	9.209e-07	9.209e-07	5.466
LCP1	4.979	6.324	3.094	0.02827	0.02827	-3.784
RPS18	4.967	6.313	3.094	0.02828	0.02828	-3.784
COL12A1	4.782	6.128	3.134	0.02704	0.02704	-3.735
MMP13	4.776	3.745	28.49	1.421e-06	1.421e-06	5.195
EIF4G3	4.478	5.826	3.088	0.02844	0.02844	-3.792
INHBA	4.414	3.564	25.38	2.475e-06	2.475e-06	4.843
CXCL6	4.269	3.492	24.14	3.151e-06	3.151e-06	4.682
GREM1	4.269	3.492	24.14	3.151e-06	3.151e-06	4.682
adamts1	4.109	3.412	22.67	4.262e-06	4.262e-06	4.469
STXBP1	3.941	5.29	3.082	0.02865	0.02865	-3.804
AEBP1	3.838	5.187	3.08	0.0287	0.0287	-3.807
coro1a	3.637	4.986	3.077	0.02881	0.02881	-3.813
PACSIN2	3.492	4.841	3.066	0.02917	0.02917	-3.826
IL4I1	3.481	3.098	15.95	2.283e-05	2.283e-05	3.133
CXCL8	3.382	4.731	3.028	0.03042	0.03042	-3.863
AKR1B10	3.382	4.731	3.028	0.03042	0.03042	-3.863
B2RD40	3.258	4.607	2.967	0.03257	0.03257	-3.922
ABCE1	3.258	4.607	2.967	0.03257	0.03257	-3.922
CLEC3B	3.191	2.953	14.14	4.046e-05	4.046e-05	2.706
EPDR1	3.191	2.953	14.14	4.046e-05	4.046e-05	2.706
ATG3	3.041	4.384	2.933	0.03386	0.03386	-3.938
ZNF326	2.851	4.2	2.773	0.04067	0.04067	-4.113
Mprip-Ntrk1	2.829	2.772	12.35	7.68e-05	7.68e-05	2.231
Q69F39	2.343	2.529	10.2	0.0001884	0.0001884	1.515
KIAA0368	-2.3	2.529	-10.01	0.0002052	0.0002052	1.444
AP3D1	-2.3	2.529	-10.01	0.0002052	0.0002052	1.444
PYCR2	-2.702	4.093	-2.681	0.04527	0.04527	-4.208
A8K2S1	-2.702	4.093	-2.681	0.04527	0.04527	-4.208
B2R6U8	-2.702	4.093	-2.681	0.04527	0.04527	-4.208
SLC25A11	-2.702	4.093	-2.681	0.04527	0.04527	-4.208
SLC39A14	-2.702	4.093	-2.681	0.04527	0.04527	-4.208
VPS45	-2.786	2.772	-12.16	8.248e-05	8.248e-05	2.177
PSMD10	-2.786	2.772	-12.16	8.248e-05	8.248e-05	2.177
B2R4A2	-2.786	2.772	-12.16	8.248e-05	8.248e-05	2.177
UBE2L6	-2.786	2.772	-12.16	8.248e-05	8.248e-05	2.177
DPM1	-2.786	2.772	-12.16	8.248e-05	8.248e-05	2.177
RPS3	-2.809	4.2	-2.751	0.04171	0.04171	-4.14
ZADH2	-2.809	4.2	-2.751	0.04171	0.04171	-4.14
DDX46	-2.905	4.296	-2.802	0.03932	0.03932	-4.09
IVD	-2.905	4.296	-2.802	0.03932	0.03932	-4.09
P3H3	-2.905	4.296	-2.802	0.03932	0.03932	-4.09
bola2	-2.993	4.384	-2.842	0.03756	0.03756	-4.051
OXCT1	-3.073	4.464	-2.878	0.03606	0.03606	-4.016
FXR2	-3.073	4.464	-2.878	0.03606	0.03606	-4.016
MARS	-3.073	4.464	-2.878	0.03606	0.03606	-4.016
TNFAIP2	-3.073	4.464	-2.878	0.03606	0.03606	-4.016
MAP7D1	-3.073	4.464	-2.878	0.03606	0.03606	-4.016
ATP1B3	-3.073	4.464	-2.878	0.03606	0.03606	-4.016
FAF2	-3.073	4.464	-2.878	0.03606	0.03606	-4.016
HSPB8	-3.146	4.538	-2.912	0.03469	0.03469	-3.982
GALK1	-3.146	4.538	-2.912	0.03469	0.03469	-3.982
SDF2	-3.148	2.953	-13.95	4.312e-05	4.312e-05	2.663
MSRB2	-3.148	2.953	-13.95	4.312e-05	4.312e-05	2.663
VPS26A	-3.148	2.953	-13.95	4.312e-05	4.312e-05	2.663
ifitm1	-3.214	4.607	-2.945	0.03341	0.03341	-3.951
TFRC	-3.214	4.607	-2.945	0.03341	0.03341	-3.951
EIF4G2	-3.214	4.607	-2.945	0.03341	0.03341	-3.951
PDDC1	-3.214	4.607	-2.945	0.03341	0.03341	-3.951
DCLK1	-3.277	4.671	-2.975	0.03229	0.03229	-3.922
COPS2	-3.277	4.671	-2.975	0.03229	0.03229	-3.922
LAMB1	-3.335	4.731	-2.998	0.03147	0.03147	-3.9
Q9UM02	-3.335	4.731	-2.998	0.03147	0.03147	-3.9
A0A590UK80	-3.388	4.788	-3.008	0.03111	0.03111	-3.894
NID2	-3.388	4.788	-3.008	0.03111	0.03111	-3.894
B4DPH4	-3.437	3.098	-15.75	2.427e-05	2.427e-05	3.095
CDK4	-3.437	3.098	-15.75	2.427e-05	2.427e-05	3.095
COG1	-3.437	3.098	-15.75	2.427e-05	2.427e-05	3.095
LYPLA2	-3.439	4.841	-2.995	0.03155	0.03155	-3.912
Q53GR7	-3.439	4.841	-2.995	0.03155	0.03155	-3.912
LETM1	-3.439	4.841	-2.995	0.03155	0.03155	-3.912
HCFC1	-3.439	4.841	-2.995	0.03155	0.03155	-3.912
MACF1	-3.489	4.892	-2.937	0.03371	0.03371	-3.986
HLA-B	-3.538	4.94	-2.809	0.03904	0.03904	-4.146
MCU	-3.538	4.94	-2.809	0.03904	0.03904	-4.146
DYNC1I2	-3.589	4.986	-2.639	0.04756	0.04756	-4.36
RNPEP	-3.677	3.218	-18.29	1.19e-05	1.19e-05	3.684
B4DV94	-3.677	3.218	-18.29	1.19e-05	1.19e-05	3.684
TPBG	-3.677	3.218	-18.29	1.19e-05	1.19e-05	3.684
COPS6	-3.883	3.321	-20.42	7.024e-06	7.024e-06	4.106
TIPRL	-3.883	3.321	-20.42	7.024e-06	7.024e-06	4.106
TRA2A	-3.883	3.321	-20.42	7.024e-06	7.024e-06	4.106
MYO1E	-3.883	3.321	-20.42	7.024e-06	7.024e-06	4.106
Q6ZMB4	-3.883	3.321	-20.42	7.024e-06	7.024e-06	4.106
PYGB	-4.023	5.412	-2.6	0.04984	0.04984	-4.406
B4E020	-4.064	3.412	-22.2	4.704e-06	4.704e-06	4.416
PSMD9	-4.064	3.412	-22.2	4.704e-06	4.704e-06	4.416
NDUFA8	-4.064	3.412	-22.2	4.704e-06	4.704e-06	4.416
TRG14	-4.064	3.412	-22.2	4.704e-06	4.704e-06	4.416
VPS36	-4.064	3.412	-22.2	4.704e-06	4.704e-06	4.416
RHOG	-4.105	5.495	-2.615	0.04897	0.04897	-4.386
TMEM43	-4.105	5.495	-2.615	0.04897	0.04897	-4.386
AHCY	-4.156	5.546	-2.624	0.04845	0.04845	-4.374
CD9	-4.225	3.492	-23.56	3.537e-06	3.537e-06	4.622
MYADM	-4.225	3.492	-23.56	3.537e-06	3.537e-06	4.622
USP41	-4.225	3.492	-23.56	3.537e-06	3.537e-06	4.622
FNBP3	-4.225	3.492	-23.56	3.537e-06	3.537e-06	4.622
Q59GA1	-4.225	3.492	-23.56	3.537e-06	3.537e-06	4.622
ATP2B1	-4.228	5.618	-2.636	0.04776	0.04776	-4.358
RPS27	-4.398	5.788	-2.663	0.04625	0.04625	-4.322
SRRM2	-4.491	5.88	-2.677	0.04549	0.04549	-4.304
SERPINB6	-4.501	3.63	-25.67	2.346e-06	2.346e-06	4.902
PDK3	-4.501	3.63	-25.67	2.346e-06	2.346e-06	4.902
EIF5B	-4.525	5.915	-2.682	0.04522	0.04522	-4.297
PPP2R2A	-4.621	3.69	-26.52	2.005e-06	2.005e-06	5.007
ARMCX2	-4.621	3.69	-26.52	2.005e-06	2.005e-06	5.007
UBA3	-4.621	3.69	-26.52	2.005e-06	2.005e-06	5.007
GFPT1	-4.724	6.114	-2.71	0.04376	0.04376	-4.261
PPP3R1	-4.731	3.745	-27.24	1.763e-06	1.763e-06	5.097
Uqcrh	-4.731	3.745	-27.24	1.763e-06	1.763e-06	5.097
GPX1	-4.731	3.745	-27.24	1.763e-06	1.763e-06	5.097
GNB2	-4.817	6.206	-2.722	0.04314	0.04314	-4.245
BCAT2	-4.833	3.797	-27.76	1.608e-06	1.608e-06	5.169
ITGB5	-4.928	3.845	-27.93	1.561e-06	1.561e-06	5.21
E9PLN8	-4.928	3.845	-27.93	1.561e-06	1.561e-06	5.21
DEK	-4.928	3.845	-27.93	1.561e-06	1.561e-06	5.21
VBP1	-5.017	3.89	-27.45	1.698e-06	1.698e-06	5.192
SRSF11	-5.017	3.89	-27.45	1.698e-06	1.698e-06	5.192
B4DT57	-5.097	3.933	-25.33	2.498e-06	2.498e-06	5.012
SCARB2	-5.176	3.973	-20.86	6.351e-06	6.351e-06	4.465
RNPS1	-5.25	4.011	-15.18	2.893e-05	2.893e-05	3.338
GDI1	-5.285	6.675	-2.778	0.04043	0.04043	-4.177
FBLN1	-5.398	4.081	-7.833	0.0006329	0.0006329	0.3715
COL1A2	-5.565	6.954	-2.808	0.03907	0.03907	-4.143
TMED7-TICAM2	-5.593	4.175	-6.873	0.001139	0.001139	-0.2584
RAB18	-5.593	4.175	-6.873	0.001139	0.001139	-0.2584
SRSF2	-5.811	4.284	-7.115	0.0009761	0.0009761	-0.09146
NME1	-5.865	7.255	-2.837	0.03777	0.03777	-4.114
HNRNPK	-6.52	7.909	-2.898	0.03523	0.03523	-4.074
GSTP1	-6.608	4.683	-8.09	0.0005466	0.0005466	0.5264
Q53GA7	-7.411	8.801	-3.004	0.03124	0.03124	-4.191
SLC25A4	-8.259	5.508	-10.11	0.0001957	0.0001957	1.58
ACTB	-8.471	9.861	-3.07	0.02904	0.02904	-4.549
